# Supplementary material
Source: PubMed Central journal article supplement (PMC6027913)

# Identification of novel lipid modifications and inter-membrane dynamics in *Corynebacterium glutamicum* using high resolution mass spectrometry

Stephan Klatt, Rajini Brammananth, Sean O'Callaghan, Konstantinos Andreas Kouremenos,  
Dedreia Tull, Paul K. Crellin, Ross L. Coppel, Malcolm J. McConville

## Supplementary Data

### Supplementary Table 1

Established lipid libraries (1-37) and libraries from LipidBlast (38-44) for lipidome analysis of *C. glutamicum*.

|    | Lipid (Sub)Class  | Libraries (MS-DIAL)  | Number of Spectra | Origin of Library |
|----|-------------------|----------------------|-------------------|-------------------|
| 1  | hTMCM             | hTMCM+NH4pos         | 115               | this study        |
| 2  | ketoTMCM          | AcTMCM+NH4pos        | 115               | this study        |
| 3  | AcTMCM            | hTMCM+NH4pos         | 115               | this study        |
| 4  | Acyl(16:0)-hTMCM  | Acyl160hTMCM+NH4pos  | 115               | this study        |
| 5  | Acyl(18:1)-hTMCM  | Acyl181hTMCM+NH4pos  | 115               | this study        |
| 6  | Acyl(16:0)-AcTMCM | Acyl160AcTMCM+NH4pos | 115               | this study        |
| 7  | h2TDCM            | hTDCM+NH4pos         | 13225             | this study        |
| 8  | Ac1-hTDCM         | Ac1hTDCM+NH4pos      | 13225             | this study        |
| 9  | hGMM              | hGMM+NH4pos          | 115               | this study        |
| 10 | AcGMM             | AcGMM+NH4pos         | 115               | this study        |
| 11 | Acyl(16:0)hGMM    | Acyl160hGMM+NH4pos   | 115               | this study        |
| 12 | hGroMM            | hGroMM+NH4pos        | 115               | this study        |
| 13 | DAG               | DAG+NH4pos           | 3025              | this study        |
| 14 | Ala-DAG           | AlaDAG+Hpos          | 3025              | this study        |
| 15 | Lys-DAG           | LysDAG+Hpos          | 3025              | this study        |
| 16 | CDP-DAG           | CDPDAG+Hpos          | 3025              | this study        |
| 17 | PG                | PG+NH4pos            | 3025              | this study        |
| 18 | PGP               | PGP+NH4pos           | 3025              | this study        |
| 19 | Ala-PG            | AlaPG+Hpos           | 3025              | this study        |
| 20 | Lys-PG            | LysPG+Hpos           | 3025              | this study        |
| 21 | Acyl-PG           | Acyl181PGtest2-Hneg  | 3025              | this study        |
| 22 | PG-like           | PGlike+NH4pos (+H)   | 3025              | this study        |
| 23 | PI                | PI+NH4pos/PI+Hpos    | 3025              | this study        |
| 24 | PIP               | PIP+NH4pos           | 3025              | this study        |
| 25 | PIM1              | PIM1+NH4pos          | 3025              | this study        |
| 26 | PIM2              | PIM2+NH4pos          | 3025              | this study        |
| 27 | PIM3              | PIM3+NH4pos          | 3025              | this study        |
| 28 | PIM4              | PIM4+NH4pos          | 3025              | this study        |
| 29 | AcPIM2            | AcPIM2+NH4pos        | 540               | this study        |
| 30 | AcPIM3            | AcPIM3+NH4pos        | 540               | this study        |
| 31 | AcPIM4            | AcPIM4+NH4pos        | 540               | this study        |
| 32 | diAcPIM2          | diAcPIM2+NH4pos      | 540               | this study        |
| 33 | GI-A              | GI-A+NH4pos          | 3025              | this study        |
| 34 | GI-X              | GI-X+NH4pos          | 3025              | this study        |
| 35 | GI-Y              | GI-Y+NH4pos          | 3025              | this study        |
| 36 | GI-Z              | GI-Z+NH4pos          | 3025              | this study        |
| 37 | CL                | CLownLib+Hpos        | 665500            | this study        |
| 38 | MAG               | MAG+NH4pos           | 80                | LipidBlast        |
| 39 | TAG               | TAG+NH4pos           | 2304              | LipidBlast        |
| 40 | PA                | PA+NH4pos            | 5476              | LipidBlast        |
| 41 | PC                | PC+Hpos              | 5476              | LipidBlast        |
| 42 | PE                | PE+Hpos              | 5746              | LipidBlast        |
| 43 | PS                | PS+Hpos              | 5123              | LipidBlast        |
| 44 | SM                | SM+Hpos              | 168               | LipidBlast        |

## Supplementary Table 2

Summary of LC-MS/MS ESI TOF (positive ionisation mode) identified hTMCM, ketoTMCM, AcTMCM and hGMM glycolipid (sub)classes in *C. glutamicum* wildtype (TL, IM, OM), TmaT KO mutant (TL, IM, OM) and PBQC (TL, IM, OM).

The mycolic acids are sorted according to their size (Da) and degree of saturation. Saturated, mono-, di- and tri-unsaturated mycolic acid chains were identified, with decreasing absolute numbers for increasing saturation levels. **(A)** 33 hTMCM species were identified within the size range of 726.5 Da ( $MA_{24:0}$ ) to 916.7 Da ( $MA_{38:3}$ ). 30% more species were detected in the IM of the TmaT KO mutant, compared to the IM of the WT, whereas 25% less species were detected when comparing the OM. They are equally distributed in the WT, and highly increased in the IM of the KO. **(B)** A total of 11 ketoTMCM species were identified, with a higher number represented in both the IM and OM of the TmaT KO mutant. In addition, no ketoTMCM species were identified in the OM of the WT, and a highly-increased number in the IM of the KO compared to its OM and the IM of the WT. **(C)** For AcTMCM species (8 species), more species were identified in both the IM and OM of the WT. They are completely absent in the KO. **(D)** hGMM species possess only one glucose unit compared to hTMCM. Here, 12 species were identified which are equally represented in the IM and OM of the KO. For the WT, 55% more species were detected in the OM. However, hGMM species are highly increased in the IM of the KO compared to the IM of the WT. Isomeric lipid species are annotated in brackets as numbers.

| A | trehalose monohydroxycorynomycolate (hTMCM) |     |     |         |     |     |      |     |     | hTMCM species | Mass (NH4+)  | trehalose monoketocorynomycolate (ketoTMCM) |    |    |         |     |     |      |     |     | ketoTMCM species | Mass (NH4+) | trehalose monoacetylcorynomycolate (AcTMCM) |     |     |         |     |     |      |     |     | AcTMCM species | Mass (NH4+) |     |     |     |     |     |     |     |     |     |     |     |     |     |     |     |     |     |     |     |     |     |     |     |     |     |     |     |     |     |     |     |     |     |     |     |     |     |     |     |     |     |     |     |     |     |     |     |     |     |     |     |     |     |     |     |     |     |     |     |     |     |     |     |     |     |     |     |     |     |     |     |     |     |     |     |     |     |     |     |     |     |     |     |     |     |     |     |     |     |     |     |     |     |     |     |     |     |     |     |     |     |     |     |     |     |     |     |     |     |     |     |     |     |     |     |     |     |     |     |     |     |     |     |     |     |     |     |     |     |     |     |     |     |     |     |     |     |     |     |     |     |     |     |     |     |     |     |     |     |     |     |     |     |     |     |     |     |     |     |     |     |     |     |     |     |     |     |     |     |     |     |     |     |     |     |     |     |     |     |     |     |     |     |     |     |     |     |     |     |     |     |     |     |     |     |     |     |     |     |     |     |     |     |     |     |     |     |     |     |     |     |     |     |     |     |     |     |     |     |     |     |     |     |     |     |     |     |     |     |     |     |     |     |     |     |     |     |     |     |     |     |     |     |     |     |     |     |     |     |     |     |     |     |     |     |     |     |     |     |     |     |     |     |     |     |     |     |     |     |     |     |     |     |     |     |     |     |     |     |     |     |     |     |     |     |     |     |     |     |     |     |     |     |     |     |     |     |     |     |     |     |     |     |     |     |     |     |     |     |     |     |     |     |     |     |     |     |     |     |     |     |     |     |     |     |     |     |     |     |     |     |     |     |     |     |     |     |     |     |     |     |     |     |     |     |     |     |     |     |     |     |     |     |     |     |     |     |     |     |     |     |     |     |     |     |     |     |     |     |     |     |     |     |     |     |     |     |     |     |     |     |     |     |     |     |     |     |     |     |     |     |     |     |     |     |     |     |     |     |     |     |     |     |     |     |     |     |     |     |     |     |     |     |     |     |     |     |     |     |     |     |     |     |     |     |     |     |     |     |     |     |     |     |     |     |     |     |     |     |     |     |     |     |     |     |     |     |     |     |     |     |     |     |     |     |     |     |     |     |     |     |     |     |     |     |     |     |     |     |     |     |     |     |     |     |     |     |     |     |     |     |     |     |     |     |     |     |     |     |     |     |     |     |     |     |     |     |     |     |     |     |     |     |     |     |     |     |     |     |     |     |     |     |     |     |     |     |     |     |     |     |     |     |     |     |     |     |     |     |     |     |     |     |     |     |     |     |     |     |     |     |     |     |     |     |     |     |     |     |     |     |     |     |     |     |     |     |     |     |     |     |     |     |     |     |     |     |     |     |     |     |     |     |     |     |     |     |     |     |     |     |     |     |     |     |     |     |     |     |     |     |     |     |     |     |     |     |     |     |     |     |     |     |     |     |     |     |     |     |     |     |     |     |     |     |     |     |     |     |     |     |     |     |     |     |     |     |     |     |     |     |     |     |     |     |     |     |     |     |     |     |     |     |     |     |     |     |     |     |     |     |     |     |     |     |     |     |     |     |     |     |     |     |     |     |     |     |     |     |     |     |     |     |     |     |     |     |     |     |     |     |     |     |     |     |     |     |     |     |     |     |     |     |     |     |     |     |     |     |     |     |     |     |     |     |     |     |     |     |     |     |     |     |     |     |     |     |     |     |     |     |     |     |     |     |     |     |     |     |     |     |     |     |     |     |     |     |     |     |     |     |     |     |     |     |     |     |     |     |     |     |     |     |     |     |     |     |     |     |     |     |     |     |     |     |     |     |     |     |     |     |     |     |     |     |     |     |     |     |     |     |     |     |     |     |     |     |     |     |     |     |     |     |     |     |     |     |     |     |     |     |     |     |     |     |     |     |     |     |     |     |     |     |     |     |     |     |     |     |     |     |     |     |     |     |     |     |     |     |     |     |     |     |     |     |     |     |     |     |     |     |     |     |     |     |     |     |     |     |     |     |     |     |     |     |     |     |     |     |     |     |     |     |     |     |     |     |     |     |     |     |     |     |     |     |     |     |     |     |     |     |     |     |     |     |     |     |     |     |     |     |     |     |     |     |     |     |     |     |     |     |     |     |     |     |     |     |     |     |     |     |     |     |     |     |     |     |     |     |     |     |     |     |     |     |     |     |     |     |     |     |     |     |     |     |     |     |     |     |     |     |     |     |     |     |     |     |     |     |     |     |     |     |     |     |     |     |     |     |     |     |     |     |     |     |     |     |     |     |     |     |     |     |     |     |     |     |     |     |     |     |     |     |     |     |     |     |     |     |     |     |     |     |     |     |     |     |     |     |     |     |     |     |     |     |     |     |     |     |     |     |     |     |     |     |     |     |     |     |     |     |     |     |     |     |     |     |     |     |     |     |     |     |     |     |     |     |     |     |     |     |     |     |     |
|---|---------------------------------------------|-----|-----|---------|-----|-----|------|-----|-----|---------------|--------------|---------------------------------------------|----|----|---------|-----|-----|------|-----|-----|------------------|-------------|---------------------------------------------|-----|-----|---------|-----|-----|------|-----|-----|----------------|-------------|-----|-----|-----|-----|-----|-----|-----|-----|-----|-----|-----|-----|-----|-----|-----|-----|-----|-----|-----|-----|-----|-----|-----|-----|-----|-----|-----|-----|-----|-----|-----|-----|-----|-----|-----|-----|-----|-----|-----|-----|-----|-----|-----|-----|-----|-----|-----|-----|-----|-----|-----|-----|-----|-----|-----|-----|-----|-----|-----|-----|-----|-----|-----|-----|-----|-----|-----|-----|-----|-----|-----|-----|-----|-----|-----|-----|-----|-----|-----|-----|-----|-----|-----|-----|-----|-----|-----|-----|-----|-----|-----|-----|-----|-----|-----|-----|-----|-----|-----|-----|-----|-----|-----|-----|-----|-----|-----|-----|-----|-----|-----|-----|-----|-----|-----|-----|-----|-----|-----|-----|-----|-----|-----|-----|-----|-----|-----|-----|-----|-----|-----|-----|-----|-----|-----|-----|-----|-----|-----|-----|-----|-----|-----|-----|-----|-----|-----|-----|-----|-----|-----|-----|-----|-----|-----|-----|-----|-----|-----|-----|-----|-----|-----|-----|-----|-----|-----|-----|-----|-----|-----|-----|-----|-----|-----|-----|-----|-----|-----|-----|-----|-----|-----|-----|-----|-----|-----|-----|-----|-----|-----|-----|-----|-----|-----|-----|-----|-----|-----|-----|-----|-----|-----|-----|-----|-----|-----|-----|-----|-----|-----|-----|-----|-----|-----|-----|-----|-----|-----|-----|-----|-----|-----|-----|-----|-----|-----|-----|-----|-----|-----|-----|-----|-----|-----|-----|-----|-----|-----|-----|-----|-----|-----|-----|-----|-----|-----|-----|-----|-----|-----|-----|-----|-----|-----|-----|-----|-----|-----|-----|-----|-----|-----|-----|-----|-----|-----|-----|-----|-----|-----|-----|-----|-----|-----|-----|-----|-----|-----|-----|-----|-----|-----|-----|-----|-----|-----|-----|-----|-----|-----|-----|-----|-----|-----|-----|-----|-----|-----|-----|-----|-----|-----|-----|-----|-----|-----|-----|-----|-----|-----|-----|-----|-----|-----|-----|-----|-----|-----|-----|-----|-----|-----|-----|-----|-----|-----|-----|-----|-----|-----|-----|-----|-----|-----|-----|-----|-----|-----|-----|-----|-----|-----|-----|-----|-----|-----|-----|-----|-----|-----|-----|-----|-----|-----|-----|-----|-----|-----|-----|-----|-----|-----|-----|-----|-----|-----|-----|-----|-----|-----|-----|-----|-----|-----|-----|-----|-----|-----|-----|-----|-----|-----|-----|-----|-----|-----|-----|-----|-----|-----|-----|-----|-----|-----|-----|-----|-----|-----|-----|-----|-----|-----|-----|-----|-----|-----|-----|-----|-----|-----|-----|-----|-----|-----|-----|-----|-----|-----|-----|-----|-----|-----|-----|-----|-----|-----|-----|-----|-----|-----|-----|-----|-----|-----|-----|-----|-----|-----|-----|-----|-----|-----|-----|-----|-----|-----|-----|-----|-----|-----|-----|-----|-----|-----|-----|-----|-----|-----|-----|-----|-----|-----|-----|-----|-----|-----|-----|-----|-----|-----|-----|-----|-----|-----|-----|-----|-----|-----|-----|-----|-----|-----|-----|-----|-----|-----|-----|-----|-----|-----|-----|-----|-----|-----|-----|-----|-----|-----|-----|-----|-----|-----|-----|-----|-----|-----|-----|-----|-----|-----|-----|-----|-----|-----|-----|-----|-----|-----|-----|-----|-----|-----|-----|-----|-----|-----|-----|-----|-----|-----|-----|-----|-----|-----|-----|-----|-----|-----|-----|-----|-----|-----|-----|-----|-----|-----|-----|-----|-----|-----|-----|-----|-----|-----|-----|-----|-----|-----|-----|-----|-----|-----|-----|-----|-----|-----|-----|-----|-----|-----|-----|-----|-----|-----|-----|-----|-----|-----|-----|-----|-----|-----|-----|-----|-----|-----|-----|-----|-----|-----|-----|-----|-----|-----|-----|-----|-----|-----|-----|-----|-----|-----|-----|-----|-----|-----|-----|-----|-----|-----|-----|-----|-----|-----|-----|-----|-----|-----|-----|-----|-----|-----|-----|-----|-----|-----|-----|-----|-----|-----|-----|-----|-----|-----|-----|-----|-----|-----|-----|-----|-----|-----|-----|-----|-----|-----|-----|-----|-----|-----|-----|-----|-----|-----|-----|-----|-----|-----|-----|-----|-----|-----|-----|-----|-----|-----|-----|-----|-----|-----|-----|-----|-----|-----|-----|-----|-----|-----|-----|-----|-----|-----|-----|-----|-----|-----|-----|-----|-----|-----|-----|-----|-----|-----|-----|-----|-----|-----|-----|-----|-----|-----|-----|-----|-----|-----|-----|-----|-----|-----|-----|-----|-----|-----|-----|-----|-----|-----|-----|-----|-----|-----|-----|-----|-----|-----|-----|-----|-----|-----|-----|-----|-----|-----|-----|-----|-----|-----|-----|-----|-----|-----|-----|-----|-----|-----|-----|-----|-----|-----|-----|-----|-----|-----|-----|-----|-----|-----|-----|-----|-----|-----|-----|-----|-----|-----|-----|-----|-----|-----|-----|-----|-----|-----|-----|-----|-----|-----|-----|-----|-----|-----|-----|-----|-----|-----|-----|-----|-----|-----|-----|-----|-----|-----|-----|-----|-----|-----|-----|-----|-----|-----|-----|-----|-----|-----|-----|-----|-----|-----|-----|-----|-----|-----|-----|-----|-----|-----|-----|-----|-----|-----|-----|-----|-----|-----|-----|-----|-----|-----|-----|-----|-----|-----|-----|-----|-----|-----|-----|-----|-----|-----|-----|-----|-----|-----|-----|-----|-----|-----|-----|-----|-----|-----|-----|-----|-----|-----|-----|-----|-----|-----|-----|-----|-----|-----|-----|-----|-----|-----|-----|-----|-----|-----|-----|-----|-----|-----|-----|-----|-----|-----|-----|-----|-----|-----|-----|-----|-----|-----|-----|-----|-----|-----|-----|-----|-----|-----|-----|-----|-----|-----|-----|-----|-----|-----|-----|-----|-----|-----|-----|-----|-----|-----|-----|-----|-----|-----|-----|-----|-----|-----|-----|-----|-----|-----|-----|-----|-----|-----|-----|-----|-----|-----|-----|-----|-----|-----|-----|-----|-----|-----|-----|-----|-----|-----|-----|-----|-----|-----|-----|-----|-----|-----|-----|-----|-----|-----|-----|-----|-----|-----|-----|-----|-----|-----|-----|-----|-----|-----|-----|-----|-----|-----|-----|-----|-----|-----|-----|-----|-----|-----|-----|-----|-----|-----|-----|-----|-----|-----|-----|-----|-----|-----|-----|-----|-----|-----|-----|-----|-----|-----|-----|-----|-----|-----|-----|-----|-----|-----|-----|-----|-----|-----|-----|-----|-----|-----|-----|-----|-----|-----|-----|-----|-----|-----|-----|-----|-----|-----|-----|-----|-----|-----|-----|-----|-----|-----|-----|-----|-----|-----|-----|
|   | WT                                          |     |     | TmaT KO |     |     | PBQC |     |     |               |              | WT                                          |    |    | TmaT KO |     |     | PBQC |     |     |                  |             | WT                                          |     |     | TmaT KO |     |     | PBQC |     |     |                |             |     |     |     |     |     |     |     |     |     |     |     |     |     |     |     |     |     |     |     |     |     |     |     |     |     |     |     |     |     |     |     |     |     |     |     |     |     |     |     |     |     |     |     |     |     |     |     |     |     |     |     |     |     |     |     |     |     |     |     |     |     |     |     |     |     |     |     |     |     |     |     |     |     |     |     |     |     |     |     |     |     |     |     |     |     |     |     |     |     |     |     |     |     |     |     |     |     |     |     |     |     |     |     |     |     |     |     |     |     |     |     |     |     |     |     |     |     |     |     |     |     |     |     |     |     |     |     |     |     |     |     |     |     |     |     |     |     |     |     |     |     |     |     |     |     |     |     |     |     |     |     |     |     |     |     |     |     |     |     |     |     |     |     |     |     |     |     |     |     |     |     |     |     |     |     |     |     |     |     |     |     |     |     |     |     |     |     |     |     |     |     |     |     |     |     |     |     |     |     |     |     |     |     |     |     |     |     |     |     |     |     |     |     |     |     |     |     |     |     |     |     |     |     |     |     |     |     |     |     |     |     |     |     |     |     |     |     |     |     |     |     |     |     |     |     |     |     |     |     |     |     |     |     |     |     |     |     |     |     |     |     |     |     |     |     |     |     |     |     |     |     |     |     |     |     |     |     |     |     |     |     |     |     |     |     |     |     |     |     |     |     |     |     |     |     |     |     |     |     |     |     |     |     |     |     |     |     |     |     |     |     |     |     |     |     |     |     |     |     |     |     |     |     |     |     |     |     |     |     |     |     |     |     |     |     |     |     |     |     |     |     |     |     |     |     |     |     |     |     |     |     |     |     |     |     |     |     |     |     |     |     |     |     |     |     |     |     |     |     |     |     |     |     |     |     |     |     |     |     |     |     |     |     |     |     |     |     |     |     |     |     |     |     |     |     |     |     |     |     |     |     |     |     |     |     |     |     |     |     |     |     |     |     |     |     |     |     |     |     |     |     |     |     |     |     |     |     |     |     |     |     |     |     |     |     |     |     |     |     |     |     |     |     |     |     |     |     |     |     |     |     |     |     |     |     |     |     |     |     |     |     |     |     |     |     |     |     |     |     |     |     |     |     |     |     |     |     |     |     |     |     |     |     |     |     |     |     |     |     |     |     |     |     |     |     |     |     |     |     |     |     |     |     |     |     |     |     |     |     |     |     |     |     |     |     |     |     |     |     |     |     |     |     |     |     |     |     |     |     |     |     |     |     |     |     |     |     |     |     |     |     |     |     |     |     |     |     |     |     |     |     |     |     |     |     |     |     |     |     |     |     |     |     |     |     |     |     |     |     |     |     |     |     |     |     |     |     |     |     |     |     |     |     |     |     |     |     |     |     |     |     |     |     |     |     |     |     |     |     |     |     |     |     |     |     |     |     |     |     |     |     |     |     |     |     |     |     |     |     |     |     |     |     |     |     |     |     |     |     |     |     |     |     |     |     |     |     |     |     |     |     |     |     |     |     |     |     |     |     |     |     |     |     |     |     |     |     |     |     |     |     |     |     |     |     |     |     |     |     |     |     |     |     |     |     |     |     |     |     |     |     |     |     |     |     |     |     |     |     |     |     |     |     |     |     |     |     |     |     |     |     |     |     |     |     |     |     |     |     |     |     |     |     |     |     |     |     |     |     |     |     |     |     |     |     |     |     |     |     |     |     |     |     |     |     |     |     |     |     |     |     |     |     |     |     |     |     |     |     |     |     |     |     |     |     |     |     |     |     |     |     |     |     |     |     |     |     |     |     |     |     |     |     |     |     |     |     |     |     |     |     |     |     |     |     |     |     |     |     |     |     |     |     |     |     |     |     |     |     |     |     |     |     |     |     |     |     |     |     |     |     |     |     |     |     |     |     |     |     |     |     |     |     |     |     |     |     |     |     |     |     |     |     |     |     |     |     |     |     |     |     |     |     |     |     |     |     |     |     |     |     |     |     |     |     |     |     |     |     |     |     |     |     |     |     |     |     |     |     |     |     |     |     |     |     |     |     |     |     |     |     |     |     |     |     |     |     |     |     |     |     |     |     |     |     |     |     |     |     |     |     |     |     |     |     |     |     |     |     |     |     |     |     |     |     |     |     |     |     |     |     |     |     |     |     |     |     |     |     |     |     |     |     |     |     |     |     |     |     |     |     |     |     |     |     |     |     |     |     |     |     |     |     |     |     |     |     |     |     |     |     |     |     |     |     |     |     |     |     |     |     |     |     |     |     |     |     |     |     |     |     |     |     |     |     |     |     |     |     |     |     |     |     |     |     |     |     |     |     |     |     |     |     |     |     |     |     |     |     |     |     |     |     |     |     |     |     |     |     |     |     |     |     |     |     |     |     |     |     |     |     |     |     |     |     |     |     |     |     |     |     |     |     |     |
|   | TL                                          | IM  | OM  | TL      | IM  | OM  | TL   | IM  | OM  |               |              | TL                                          | IM | OM | TL      | IM  | OM  | TL   | IM  | OM  |                  |             | TL                                          | IM  | OM  | TL      | IM  | OM  | TL   | IM  | OM  |                |             |     |     |     |     |     |     |     |     |     |     |     |     |     |     |     |     |     |     |     |     |     |     |     |     |     |     |     |     |     |     |     |     |     |     |     |     |     |     |     |     |     |     |     |     |     |     |     |     |     |     |     |     |     |     |     |     |     |     |     |     |     |     |     |     |     |     |     |     |     |     |     |     |     |     |     |     |     |     |     |     |     |     |     |     |     |     |     |     |     |     |     |     |     |     |     |     |     |     |     |     |     |     |     |     |     |     |     |     |     |     |     |     |     |     |     |     |     |     |     |     |     |     |     |     |     |     |     |     |     |     |     |     |     |     |     |     |     |     |     |     |     |     |     |     |     |     |     |     |     |     |     |     |     |     |     |     |     |     |     |     |     |     |     |     |     |     |     |     |     |     |     |     |     |     |     |     |     |     |     |     |     |     |     |     |     |     |     |     |     |     |     |     |     |     |     |     |     |     |     |     |     |     |     |     |     |     |     |     |     |     |     |     |     |     |     |     |     |     |     |     |     |     |     |     |     |     |     |     |     |     |     |     |     |     |     |     |     |     |     |     |     |     |     |     |     |     |     |     |     |     |     |     |     |     |     |     |     |     |     |     |     |     |     |     |     |     |     |     |     |     |     |     |     |     |     |     |     |     |     |     |     |     |     |     |     |     |     |     |     |     |     |     |     |     |     |     |     |     |     |     |     |     |     |     |     |     |     |     |     |     |     |     |     |     |     |     |     |     |     |     |     |     |     |     |     |     |     |     |     |     |     |     |     |     |     |     |     |     |     |     |     |     |     |     |     |     |     |     |     |     |     |     |     |     |     |     |     |     |     |     |     |     |     |     |     |     |     |     |     |     |     |     |     |     |     |     |     |     |     |     |     |     |     |     |     |     |     |     |     |     |     |     |     |     |     |     |     |     |     |     |     |     |     |     |     |     |     |     |     |     |     |     |     |     |     |     |     |     |     |     |     |     |     |     |     |     |     |     |     |     |     |     |     |     |     |     |     |     |     |     |     |     |     |     |     |     |     |     |     |     |     |     |     |     |     |     |     |     |     |     |     |     |     |     |     |     |     |     |     |     |     |     |     |     |     |     |     |     |     |     |     |     |     |     |     |     |     |     |     |     |     |     |     |     |     |     |     |     |     |     |     |     |     |     |     |     |     |     |     |     |     |     |     |     |     |     |     |     |     |     |     |     |     |     |     |     |     |     |     |     |     |     |     |     |     |     |     |     |     |     |     |     |     |     |     |     |     |     |     |     |     |     |     |     |     |     |     |     |     |     |     |     |     |     |     |     |     |     |     |     |     |     |     |     |     |     |     |     |     |     |     |     |     |     |     |     |     |     |     |     |     |     |     |     |     |     |     |     |     |     |     |     |     |     |     |     |     |     |     |     |     |     |     |     |     |     |     |     |     |     |     |     |     |     |     |     |     |     |     |     |     |     |     |     |     |     |     |     |     |     |     |     |     |     |     |     |     |     |     |     |     |     |     |     |     |     |     |     |     |     |     |     |     |     |     |     |     |     |     |     |     |     |     |     |     |     |     |     |     |     |     |     |     |     |     |     |     |     |     |     |     |     |     |     |     |     |     |     |     |     |     |     |     |     |     |     |     |     |     |     |     |     |     |     |     |     |     |     |     |     |     |     |     |     |     |     |     |     |     |     |     |     |     |     |     |     |     |     |     |     |     |     |     |     |     |     |     |     |     |     |     |     |     |     |     |     |     |     |     |     |     |     |     |     |     |     |     |     |     |     |     |     |     |     |     |     |     |     |     |     |     |     |     |     |     |     |     |     |     |     |     |     |     |     |     |     |     |     |     |     |     |     |     |     |     |     |     |     |     |     |     |     |     |     |     |     |     |     |     |     |     |     |     |     |     |     |     |     |     |     |     |     |     |     |     |     |     |     |     |     |     |     |     |     |     |     |     |     |     |     |     |     |     |     |     |     |     |     |     |     |     |     |     |     |     |     |     |     |     |     |     |     |     |     |     |     |     |     |     |     |     |     |     |     |     |     |     |     |     |     |     |     |     |     |     |     |     |     |     |     |     |     |     |     |     |     |     |     |     |     |     |     |     |     |     |     |     |     |     |     |     |     |     |     |     |     |     |     |     |     |     |     |     |     |     |     |     |     |     |     |     |     |     |     |     |     |     |     |     |     |     |     |     |     |     |     |     |     |     |     |     |     |     |     |     |     |     |     |     |     |     |     |     |     |     |     |     |     |     |     |     |     |     |     |     |     |     |     |     |     |     |     |     |     |     |     |     |     |     |     |     |     |     |     |     |     |     |     |     |     |     |     |     |     |     |     |     |     |     |     |     |     |     |     |     |     |     |     |     |     |     |     |     |     |     |     |     |     |     |     |     |     |     |     |
| 1 | hTMCM (24:0)                                | yes | yes | yes     | yes | yes | yes  | yes | yes | 1             | hTMCM (24:0) | 726.499                                     | no | no | yes     | yes | yes | yes  | yes | yes | yes              | yes         | yes                                         | yes | yes | yes     | yes | yes | yes  | yes | yes | yes            | yes         | yes | yes | yes | yes | yes | yes | yes | yes | yes | yes | yes | yes | yes | yes | yes | yes | yes | yes | yes | yes | yes | yes | yes | yes | yes | yes | yes | yes | yes | yes | yes | yes | yes | yes | yes | yes | yes | yes | yes | yes | yes | yes | yes | yes | yes | yes | yes | yes | yes | yes | yes | yes | yes | yes | yes | yes | yes | yes | yes | yes | yes | yes | yes | yes | yes | yes | yes | yes | yes | yes | yes | yes | yes | yes | yes | yes | yes | yes | yes | yes | yes | yes | yes | yes | yes | yes | yes | yes | yes | yes | yes | yes | yes | yes | yes | yes | yes | yes | yes | yes | yes | yes | yes | yes | yes | yes | yes | yes | yes | yes | yes | yes | yes | yes | yes | yes | yes | yes | yes | yes | yes | yes | yes | yes | yes | yes | yes | yes | yes | yes | yes | yes | yes | yes | yes | yes | yes | yes | yes | yes | yes | yes | yes | yes | yes | yes | yes | yes | yes | yes | yes | yes | yes | yes | yes | yes | yes | yes | yes | yes | yes | yes | yes | yes | yes | yes | yes | yes | yes | yes | yes | yes | yes | yes | yes | yes | yes | yes | yes | yes | yes | yes | yes | yes | yes | yes | yes | yes | yes | yes | yes | yes | yes | yes | yes | yes | yes | yes | yes | yes | yes | yes | yes | yes | yes | yes | yes | yes | yes | yes | yes | yes | yes | yes | yes | yes | yes | yes | yes | yes | yes | yes | yes | yes | yes | yes | yes | yes | yes | yes | yes | yes | yes | yes | yes | yes | yes | yes | yes | yes | yes | yes | yes | yes | yes | yes | yes | yes | yes | yes | yes | yes | yes | yes | yes | yes | yes | yes | yes | yes | yes | yes | yes | yes | yes | yes | yes | yes | yes | yes | yes | yes | yes | yes | yes | yes | yes | yes | yes | yes | yes | yes | yes | yes | yes | yes | yes | yes | yes | yes | yes | yes | yes | yes | yes | yes | yes | yes | yes | yes | yes | yes | yes | yes | yes | yes | yes | yes | yes | yes | yes | yes | yes | yes | yes | yes | yes | yes | yes | yes | yes | yes | yes | yes | yes | yes | yes | yes | yes | yes | yes | yes | yes | yes | yes | yes | yes | yes | yes | yes | yes | yes | yes | yes | yes | yes | yes | yes | yes | yes | yes | yes | yes | yes | yes | yes | yes | yes | yes | yes | yes | yes | yes | yes | yes | yes | yes | yes | yes | yes | yes | yes | yes | yes | yes | yes | yes | yes | yes | yes | yes | yes | yes | yes | yes | yes | yes | yes | yes | yes | yes | yes | yes | yes | yes | yes | yes | yes | yes | yes | yes | yes | yes | yes | yes | yes | yes | yes | yes | yes | yes | yes | yes | yes | yes | yes | yes | yes | yes | yes | yes | yes | yes | yes | yes | yes | yes | yes | yes | yes | yes | yes | yes | yes | yes | yes | yes | yes | yes | yes | yes | yes | yes | yes | yes | yes | yes | yes | yes | yes | yes | yes | yes | yes | yes | yes | yes | yes | yes | yes | yes | yes | yes | yes | yes | yes | yes | yes | yes | yes | yes | yes | yes | yes | yes | yes | yes | yes | yes | yes | yes | yes | yes | yes | yes | yes | yes | yes | yes | yes | yes | yes | yes | yes | yes | yes | yes | yes | yes | yes | yes | yes | yes | yes | yes | yes | yes | yes | yes | yes | yes | yes | yes | yes | yes | yes | yes | yes | yes | yes | yes | yes | yes | yes | yes | yes | yes | yes | yes | yes | yes | yes | yes | yes | yes | yes | yes | yes | yes | yes | yes | yes | yes | yes | yes | yes | yes | yes | yes | yes | yes | yes | yes | yes | yes | yes | yes | yes | yes | yes | yes | yes | yes | yes | yes | yes | yes | yes | yes | yes | yes | yes | yes | yes | yes | yes | yes | yes | yes | yes | yes | yes | yes | yes | yes | yes | yes | yes | yes | yes | yes | yes | yes | yes | yes | yes | yes | yes | yes | yes | yes | yes | yes | yes | yes | yes | yes | yes | yes | yes | yes | yes | yes | yes | yes | yes | yes | yes | yes | yes | yes | yes | yes | yes | yes | yes | yes | yes | yes | yes | yes | yes | yes | yes | yes | yes | yes | yes | yes | yes | yes | yes | yes | yes | yes | yes | yes | yes | yes | yes | yes | yes | yes | yes | yes | yes | yes | yes | yes | yes | yes | yes | yes | yes | yes | yes | yes | yes | yes | yes | yes | yes | yes | yes | yes | yes | yes | yes | yes | yes | yes | yes | yes | yes | yes | yes | yes | yes | yes | yes | yes | yes | yes | yes | yes | yes | yes | yes | yes | yes | yes | yes | yes | yes | yes | yes | yes | yes | yes | yes | yes | yes | yes | yes | yes | yes | yes | yes | yes | yes | yes | yes | yes | yes | yes | yes | yes | yes | yes | yes | yes | yes | yes | yes | yes | yes | yes | yes | yes | yes | yes | yes | yes | yes | yes | yes | yes | yes | yes | yes | yes | yes | yes | yes | yes | yes | yes | yes | yes | yes | yes | yes | yes | yes | yes | yes | yes | yes | yes | yes | yes | yes | yes | yes | yes | yes | yes | yes | yes | yes | yes | yes | yes | yes | yes | yes | yes | yes | yes | yes | yes | yes | yes | yes | yes | yes | yes | yes | yes | yes | yes | yes | yes | yes | yes | yes | yes | yes | yes | yes | yes | yes | yes | yes | yes | yes | yes | yes | yes | yes | yes | yes | yes | yes | yes | yes | yes | yes | yes | yes | yes | yes | yes | yes | yes | yes | yes | yes | yes | yes | yes | yes | yes | yes | yes | yes | yes | yes | yes | yes | yes | yes | yes | yes | yes | yes | yes | yes | yes | yes | yes | yes | yes | yes | yes | yes | yes | yes | yes | yes | yes | yes | yes | yes | yes | yes | yes | yes | yes | yes | yes | yes | yes | yes | yes | yes | yes | yes | yes | yes | yes | yes | yes | yes | yes | yes | yes | yes | yes | yes | yes | yes | yes | yes | yes | yes | yes | yes | yes | yes | yes | yes | yes | yes | yes | yes | yes | yes | yes | yes | yes | yes | yes | yes | yes | yes | yes | yes | yes | yes | yes | yes | yes | yes | yes | yes | yes | yes | yes | yes | yes | yes | yes | yes | yes | yes | yes | yes | yes | yes | yes | yes | yes | yes | yes | yes | yes | yes | yes | yes | yes | yes | yes | yes | yes | yes | yes | yes | yes | yes | yes | yes | yes | yes | yes | yes | yes | yes | yes | yes | yes | yes | yes | yes | yes | yes | yes | yes | yes | yes | yes | yes | yes | yes | yes | yes | yes | yes | yes | yes | yes | yes | yes | yes | yes | yes | yes | yes | yes | yes | yes | yes | yes | yes | yes | yes | yes | yes | yes | yes | yes | yes | yes | yes | yes | yes | yes | yes | yes | yes | yes | yes | yes | yes | yes | yes | yes | yes | yes | yes | yes | yes | yes | yes |

**Supplementary Table 3:**

Summary of LC-MS/MS ESI TOF (pos. mode) identified h2TDCM glycolipid species (cord factor) in *C. glutamicum* wildtype (TL, IM, OM), TmaT KO mutant (TL, IM, OM) and PBQC (TL, IM, OM).

Altogether, 43 h2TDCM species were identified within the size range of 1174.9 Da (MA<sub>26:0</sub> + MA<sub>28:1</sub>) to 1427.2 Da (MA<sub>36:0</sub> + MA<sub>36:1</sub>) containing 21 different mycolic acid (MA) moieties. h2TDCM species carry two MA moieties. The five most identified mycolic acid moieties were MA<sub>32:0</sub> (15x), MA<sub>34:1</sub> (10x), MA<sub>34:0</sub> (8x), MA<sub>36:2</sub> (6x) and MA<sub>36:1</sub>/MA<sub>26:0</sub> (5x each). For 10 h2TDCM species, the two MA moieties could not be clearly identified. Moreover, three isobaric h2TDCMs were identified. In the IM and OM of the WT, h2TDCM species were equally present, whereas there were more species identified in the IM of the TmaT KO compared to its OM. Isomeric lipid species are annotated in brackets as numbers.

|             | h2TDCM species | 1st MA | 2nd MA | Mass (NH4+) | trehalose di-hydroxycorynomycolate (h2TDCM) |     |     |         |     |     |      |     |     |
|-------------|----------------|--------|--------|-------------|---------------------------------------------|-----|-----|---------|-----|-----|------|-----|-----|
|             |                |        |        |             | WT                                          |     |     | TmaT KO |     |     | PBQC |     |     |
|             |                |        |        |             | TL                                          | IM  | OM  | TL      | IM  | OM  | TL   | IM  | OM  |
| 1           | h2TDCM         | (26:0) | (28:1) | 1174.927    | yes                                         | yes | no  | no      | yes | no  | no   | yes | no  |
| 2           | h2TDCM         | (26:0) | (28:0) | 1176.943    | yes                                         | yes | no  | no      | no  | no  | yes  | yes | no  |
| 3           | h2TDCM         | (22:0) | (32:0) | 1202.96     | yes                                         | no  | no  | yes     | yes | yes | yes  | no  | no  |
| 4           | h2TDCM         | (24:1) | (32:0) | 1204.975    | yes                                         | no  | no  | no      | no  | yes | yes  | no  | yes |
| 5           | h2TDCM         | (58:2) |        | 1228.974    | no                                          | yes | yes | no      | yes | no  | no   | yes | no  |
| 6           | h2TDCM         | (26:1) | (32:0) | 1230.989    | yes                                         | yes | yes | yes     | yes | yes | yes  | yes | yes |
| 7           | h2TDCM         | (26:0) | (32:0) | 1233.006    | yes                                         | yes | yes | yes     | yes | yes | yes  | yes | yes |
| 8           | h2TDCM         | (60:3) |        | 1254.991    | no                                          | no  | no  | no      | yes | no  | no   | no  | no  |
| 9           | h2TDCM         | (26:1) | (34:1) | 1257.006    | yes                                         | yes | yes | yes     | yes | yes | yes  | no  | yes |
| 10          | h2TDCM         | (26:0) | (34:1) | 1259.022    | yes                                         | yes | yes | yes     | yes | yes | yes  | yes | yes |
| 11          | h2TDCM         | (28:1) | (32:0) | 1261.037    | yes                                         | yes | yes | yes     | yes | yes | yes  | yes | yes |
| 12          | h2TDCM         | (28:0) | (32:0) | 1283.023    | yes                                         | yes | yes | yes     | yes | yes | yes  | yes | yes |
| 13          | h2TDCM         | (26:0) | (34:0) | 1285.038    | no                                          | yes | yes | yes     | yes | yes | no   | yes | yes |
| 14          | h2TDCM         | (28:2) | (34:1) | 1285.038    | no                                          | yes | no  | yes     | yes | no  | no   | no  | yes |
| 15          | h2TDCM         | (28:1) | (34:1) | 1287.053    | yes                                         | yes | yes | yes     | yes | yes | yes  | yes | yes |
| 16          | h2TDCM         | (28:0) | (34:1) | 1287.053    | yes                                         | yes | yes | yes     | yes | yes | yes  | yes | yes |
| 17          | h2TDCM         | (30:0) | (32:0) | 1289.069    | yes                                         | yes | yes | yes     | yes | yes | yes  | yes | yes |
| 18          | h2TDCM         | (31:0) | (32:1) | 1301.068    | yes                                         | no  | no  | no      | no  | no  | no   | yes | no  |
| 19          | h2TDCM         | (64:4) |        | 1309.033    | no                                          | no  | yes | no      | yes | yes | no   | no  | no  |
| 20          | h2TDCM         | (64:2) |        | 1313.069    | yes                                         | no  | no  | yes     | no  | yes | yes  | no  | no  |
| 21          | h2TDCM         | (32:0) | (32:1) | 1315.083    | yes                                         | yes | yes | yes     | yes | yes | yes  | yes | yes |
| 22          | h2TDCM         | (32:0) | (32:0) | 1317.099    | yes                                         | yes | yes | yes     | yes | yes | yes  | yes | yes |
| 23          | h2TDCM         | (65:1) |        | 1329.099    | yes                                         | yes | yes | no      | no  | no  | yes  | yes | no  |
| 24          | h2TDCM         | (32:0) | (33:0) | 1331.115    | yes                                         | yes | yes | no      | no  | no  | yes  | yes | no  |
| 25          | h2TDCM         | (66:3) |        | 1339.083    | no                                          | no  | no  | no      | no  | no  | no   | yes | no  |
| 26          | h2TDCM         | (32:0) | (34:2) | 1341.099    | yes                                         | yes | yes | yes     | yes | yes | yes  | yes | yes |
| 27          | h2TDCM         | (32:0) | (34:1) | 1343.113    | yes (2)                                     | yes | yes | yes     | yes | yes | yes  | yes | yes |
| 28          | h2TDCM         | (32:0) | (34:0) | 1345.13     | yes                                         | yes | yes | yes     | yes | yes | yes  | yes | yes |
| 29          | h2TDCM         | (33:1) | (34:0) | 1357.141    | yes                                         | yes | yes | yes     | yes | yes | yes  | no  | yes |
| 30          | h2TDCM         | (67:0) |        | 1359.144    | no                                          | no  | yes | no      | yes | no  | yes  | yes | yes |
| 31          | h2TDCM         | (68:4) |        | 1365.1      | no                                          | no  | no  | no      | no  | no  | no   | yes | no  |
| 32          | h2TDCM         | (68:3) |        | 1367.116    | yes                                         | yes | no  | no      | no  | yes | yes  | no  | no  |
| 33          | h2TDCM         | (34:1) | (34:1) | 1369.129    | no                                          | yes | yes | no      | yes | yes | yes  | no  | yes |
| 34          | h2TDCM         | (34:0) | (34:1) | 1371.146    | yes                                         | yes | yes | yes     | yes | no  | yes  | yes | yes |
| 35          | h2TDCM         | (34:0) | (34:0) | 1373.162    | yes                                         | no  | yes | no      | yes | yes | yes  | yes | no  |
| 36          | h2TDCM         | (34:0) | (34:0) | 1373.162    | yes                                         | yes | no  | no      | no  | no  | yes  | no  | no  |
| 37          | h2TDCM         | (34:2) | (36:2) | 1393.131    | yes                                         | yes | no  | no      | no  | no  | yes  | no  | no  |
| 38          | h2TDCM         | (34:1) | (36:2) | 1395.145    | no                                          | no  | yes | no      | yes | no  | no   | yes | yes |
| 39          | h2TDCM         | (70:2) |        | 1397.162    | yes                                         | yes | yes | yes     | yes | yes | yes  | yes | yes |
| 40          | h2TDCM         | (34:0) | (36:1) | 1399.172    | yes                                         | yes | yes | yes     | yes | yes | no   | yes | yes |
| 41          | h2TDCM         | (34:0) | (36:0) | 1401.192    | yes                                         | no  | yes | yes     | yes | no  | yes  | yes | yes |
| 42          | h2TDCM         | (36:2) | (36:3) | 1419.144    | yes                                         | yes | no  | no      | no  | no  | yes  | no  | no  |
| 43          | h2TDCM         | (36:2) | (36:2) | 1421.16     | no                                          | no  | yes | no      | yes | no  | no   | no  | no  |
| 44          | h2TDCM         | (36:1) | (36:2) | 1423.176    | yes                                         | yes | yes | yes     | yes | yes | yes  | yes | yes |
| 45          | h2TDCM         | (36:1) | (36:1) | 1425.192    | yes                                         | yes | yes | yes     | yes | yes | no   | yes | yes |
| 46          | h2TDCM         | (36:0) | (36:1) | 1427.209    | yes                                         | no  | no  | yes     | yes | yes | no   | no  | no  |
| 47          | h2TDCM         | (36:0) | (36:1) | 1427.209    | yes                                         | yes | yes | no      | no  | no  | yes  | yes | no  |
| Total (43): |                |        |        |             | 30                                          | 28  | 28  | 22      | 30  | 25  | 29   | 29  | 23  |

**Supplementary Table 4:**

Summary of LC-MS/MS ESI TOF (pos. mode) identified Ac1-hTDCM, Acyl-hTMCM and Acyl-AcTMCM glycolipid species in *C. glutamicum* wildtype (TL, IM, OM), TmaT KO mutant (TL, IM, OM) and PBQC (TL, IM, OM).

All three mycolic acid subclasses have not been described before. **(A)** Ac1-hTDCM species are closely related to h2TDCM species with the only difference that one of the two mycolic acid moieties carries an acetyl group instead of a hydroxyl group. This new species was identified in the WT as well as in the TmaT KO mutant, and also in both the IM and OM fraction. **(B)** Acyl-hTMCM species are based on hTMCM species, but carry an additional fatty acid or fatty alcohol (16:0 or 18:1) on their terminal glucose unit of the trehalose. More species were identified in the TmaT KO mutant compared to the WT, and they also were more abundant in the IM compared to the OM. **(C)** Acyl-AcTMCM species are based on AcTMCM, but carry the same additional group on their trehalose unit as Acyl-hTMCM species. Only one species was identified in the IM of the WT. Isomeric lipid species are annotated in brackets as numbers.

**A**

|            | Ac1-hTDCM species | 1st MA | 2nd MA | Mass (NH4+) | trehalose acetyl-hydroxycorynomycolate (Ac1-hTDCM) |     |     |         |     |     |      |     |     |
|------------|-------------------|--------|--------|-------------|----------------------------------------------------|-----|-----|---------|-----|-----|------|-----|-----|
|            |                   |        |        |             | WT                                                 |     |     | TmaT KO |     |     | PBQC |     |     |
|            |                   |        |        |             | TL                                                 | IM  | OM  | TL      | IM  | OM  | TL   | IM  | OM  |
| 1          | Ac1-hTDCM         | (32:0) | (32:0) | 1359.111    | yes                                                | yes | yes | yes     | yes | no  | yes  | yes | yes |
| 2          | Ac1-hTDCM         | (32:0) | (34:1) | 1385.126    | yes                                                | yes | yes | yes     | yes | yes | yes  | yes | yes |
| 3          | Ac1-hTDCM         | (32:0) | (34:0) | 1387.137    | yes                                                | yes | yes | no      | yes | no  | yes  | yes | yes |
| Total (3): |                   |        |        |             | 3                                                  | 3   | 3   | 2       | 3   | 1   | 3    | 3   | 3   |

**B**

|             | Acyl-hTMCM species      | Mass (NH4+) | acyl-trehalose monohydroxycorynomycolate (Acyl-hTMCM) |     |         |          |         |     |          |         |     |
|-------------|-------------------------|-------------|-------------------------------------------------------|-----|---------|----------|---------|-----|----------|---------|-----|
|             |                         |             | WT                                                    |     |         | TmaT KO  |         |     | PBQC     |         |     |
|             |                         |             | TL                                                    | IM  | OM      | TL       | IM      | OM  | TL       | IM      | OM  |
| 1           | Acyl(16:0)-hTMCM (30:0) | 1048.824    | yes                                                   | no  | no      | yes      | yes     | no  | yes      | yes     | no  |
| 2           | Acyl(16:0)-hTMCM (32:0) | 1076.853    | yes (2)                                               | yes | yes     | yes (2x) | yes     | yes | yes      | yes     | yes |
| 3           | Acyl(16:0)-hTMCM (34:0) | 1104.886    | yes                                                   | yes | yes (2) | yes      | yes     | no  | yes      | yes     | yes |
| 4           | Acyl(16:0)-hTMCM (32:1) | 1074.839    | yes                                                   | yes | no      | yes (2x) | yes     | no  | yes (2x) | yes (2) | no  |
| 5           | Acyl(16:0)-hTMCM (34:1) | 1102.87     | yes                                                   | no  | no      | yes      | yes (2) | no  | yes      | yes     | no  |
| 6           | Acyl(16:0)-hTMCM (36:1) | 1130.903    | no                                                    | no  | no      | no       | yes     | no  | (yes)    | no      | no  |
| 7           | Acyl(16:0)-hTMCM (34:2) | 1100.854    | yes                                                   | no  | no      | yes (2x) | yes (2) | no  | yes (2x) | yes (2) | no  |
| 8           | Acyl(16:0)-hTMCM (36:3) | 1126.869    | (yes)                                                 | no  | no      | yes (2x) | (yes 2) | no  | (yes)    | yes     | no  |
| 9           | Acyl(18:1)-hTMCM (32:0) | 1102.868    | no                                                    | yes | yes     | yes      | no      | yes | no       | no      | yes |
| 10          | Acyl(18:1)-hTMCM (34:0) | 1130.901    | yes                                                   | yes | yes     | no       | no      | yes | no       | yes     | yes |
| 11          | Acyl(18:1)-hTMCM (34:1) | 1128.887    | yes                                                   | yes | yes     | yes      | yes     | yes | yes      | yes     | yes |
| 12          | Acyl(18:1)-hTMCM (36:1) | 1156.918    | no                                                    | no  | no      | yes      | yes     | no  | yes      | yes     | no  |
| 13          | Acyl(18:1)-hTMCM (36:2) | 1154.901    | yes                                                   | yes | no      | yes      | yes     | yes | yes      | yes     | yes |
| 14          | Acyl(18:1)-hTMCM (36:3) | 1152.885    | no                                                    | no  | no      | yes      | yes     | no  | no       | no      | no  |
| Total (14): |                         |             | 10                                                    | 7   | 5       | 12       | 12      | 5   | 11       | 11      | 6   |

**C**

|            | Acyl-AcTMCM species      | Mass (NH4+) | acyl-trehalose monoacetylcorynomycolate (Acyl-AcTMCM) |     |    |         |    |    |      |     |    |
|------------|--------------------------|-------------|-------------------------------------------------------|-----|----|---------|----|----|------|-----|----|
|            |                          |             | WT                                                    |     |    | TmaT KO |    |    | PBQC |     |    |
|            |                          |             | TL                                                    | IM  | OM | TL      | IM | OM | TL   | IM  | OM |
| 1          | Acyl(16:0)-AcTMCM (32:0) | 1118.8646   | yes                                                   | yes | no | no      | no | no | yes  | yes | no |
| Total (1): |                          |             | 1                                                     | 1   | 0  | 0       | 0  | 0  | 1    | 1   | 0  |

### Supplementary Table 5

Summary of LC-MS/MS ESI TOF (pos. mode) identified DAG, Ala-DAG, CDP-DAG, PA and TAG lipid species in *C. glutamicum* wildtype (TL, IM, OM), TmaT KO mutant (TL, IM, OM) and PBQC (TL, IM, OM).

The lipids are sorted according to their size (Da). Saturated, mono-, di- and one tri-unsaturated fatty acid chains were identified, with FA<sub>16:0</sub>, FA<sub>16:1</sub>, FA<sub>18:0</sub> and FA<sub>18:1</sub> being the most abundant ones. All identified DAGs were also found to be alanylated (13 species). CDP-DAG is an intermediate in the biosynthesis of PI and PG. Only one CDP-DAG was identified in the IM, carrying the highly abundant DAG<sub>16:0/18:1</sub>. Altogether, 13 TAGs were identified. They were equally identified in the IM and OM of the WT and KO. Isomeric lipid species are annotated in brackets as numbers.

| A  | DAG species     | diacylglycerol (DAG)                |        |             |     |         | cytidine diphosphate diacylglycerol (CDP-DAG) |        |        |           |             | phosphatidic acid (PA) |        |             |     |         |
|----|-----------------|-------------------------------------|--------|-------------|-----|---------|-----------------------------------------------|--------|--------|-----------|-------------|------------------------|--------|-------------|-----|---------|
|    |                 | 1st FA                              | 2nd FA | Mass (NH4+) | WT  | TmaT KO | PBQC                                          | 1st FA | 2nd FA | Mass (H+) | WT          | 1st FA                 | 2nd FA | Mass (NH4+) | WT  | TmaT KO |
| 1  | DAG             | (14:0)                              | (18:1) | 584.5245    | yes | yes     | no                                            | yes    | yes    | 980.54    | yes         | yes                    | yes    | yes         | yes | yes     |
| 2  | DAG             | (16:2)                              | (18:1) | 608.5252    | no  | yes     | no                                            | yes    | yes    |           | yes         | yes                    | yes    | yes         | yes | yes     |
| 3  | DAG             | (16:1)                              | (18:1) | 610.5417    | yes | yes     | yes                                           | yes    | yes    |           | yes         | yes                    | yes    | yes         | yes | yes     |
| 4  | DAG             | (16:0)                              | (18:1) | 612.5586    | yes | yes     | yes                                           | yes    | yes    |           | yes         | yes                    | yes    | yes         | yes | yes     |
| 5  | DAG             | (17:0)                              | (18:1) | 626.5725    | yes | no      | yes                                           | yes    | yes    |           | yes         | yes                    | yes    | yes         | yes | yes     |
| 6  | DAG             | (18:1)                              | (18:2) | 636.5558    | yes | yes     | no                                            | yes    | yes    |           | yes         | yes                    | yes    | yes         | yes | yes     |
| 7  | DAG             | (18:1)                              | (18:1) | 638.5742    | yes | yes     | yes                                           | yes    | yes    |           | yes         | yes                    | yes    | yes         | yes | yes     |
| 8  | DAG             | (18:0)                              | (18:1) | 640.5872    | yes | yes     | yes                                           | yes    | yes    |           | yes         | yes                    | yes    | yes         | yes | yes     |
|    |                 | Total (8):                          |        |             | 7   | 7       | 4                                             | 8      | 8      |           | 2           | 2                      | 2      | 2           | 0   | 0       |
| B  | Ala-DAG species | alanylated diacylglycerol (Ala-DAG) |        |             |     |         | triacylglycerol (TAG)                         |        |        |           |             | Total (13):            |        |             |     |         |
|    |                 | 1st FA                              | 2nd FA | Mass (H+)   | WT  | TmaT KO | PBQC                                          | 1st FA | 2nd FA | 3rd FA    | Mass (NH4+) | WT                     | IM     | OM          | TL  | IM      |
| 1  | Ala-DAG         | (14:0)                              | (18:1) | 638.538     | yes | yes     | no                                            | yes    | yes    | yes       | 796.739     | no                     | no     | no          | no  | no      |
| 2  | Ala-DAG         | (16:0)                              | (16:0) | 640.5514    | yes | no      | no                                            | yes    | yes    | yes       | 822.755     | no                     | yes    | yes         | yes | yes     |
| 3  | Ala-DAG         | (15:0)                              | (18:1) | 652.5512    | yes | yes     | no                                            | yes    | yes    | yes       | 824.77      | yes                    | yes    | yes         | yes | yes     |
| 4  | Ala-DAG         | (16:2)                              | (18:1) | 662.5353    | yes | yes     | no                                            | yes    | yes    | yes       | 848.77      | yes                    | yes    | yes         | yes | yes     |
| 5  | Ala-DAG         | (16:1)                              | (18:1) | 664.554     | yes | yes     | no                                            | yes    | yes    | yes       | 850.786     | no                     | yes    | yes         | yes | yes     |
| 6  | Ala-DAG         | (16:0)                              | (18:1) | 666.5667    | yes | yes     | yes                                           | yes    | yes    | yes       | 874.786     | yes                    | yes    | yes         | yes | yes     |
| 7  | Ala-DAG         | (16:0)                              | (18:0) | 668.5825    | yes | no      | no                                            | yes    | yes    | yes       | 876.801     | yes                    | yes    | yes         | yes | yes     |
| 8  | Ala-DAG         | (17:0)                              | (18:1) | 680.5821    | yes | yes     | no                                            | yes    | yes    | yes       | 878.817     | yes                    | yes    | yes         | yes | yes     |
| 9  | Ala-DAG         | (36:4)                              | (18:2) | 688.5492    | yes | yes     | yes                                           | yes    | yes    | yes       | 900.802     | yes                    | no     | yes         | yes | yes     |
| 10 | Ala-DAG         | (18:1)                              | (18:1) | 690.5671    | yes | yes     | yes                                           | yes    | yes    | yes       | 902.817     | yes                    | yes    | yes         | yes | yes     |
| 11 | Ala-DAG         | (18:1)                              | (18:1) | 692.5893    | yes | yes     | yes                                           | yes    | yes    | yes       | 904.833     | yes                    | yes    | yes         | yes | yes     |
| 12 | Ala-DAG         | (18:0)                              | (18:1) | 694.5999    | yes | yes     | yes                                           | yes    | yes    | yes       | 906.848     | yes                    | yes    | yes         | yes | yes     |
| 13 | Ala-DAG         | (38:5)                              | (18:0) | 714.5643    | yes | yes     | yes                                           | yes    | yes    | yes       | 908.865     | no                     | no     | no          | no  | no      |
|    |                 | Total (13):                         |        |             | 13  | 11      | 5                                             | 9      | 9      | 2         |             | 9                      | 10     | 10          | 10  | 11      |

### Supplementary Table 6

Summary of LC-MS/MS ESI TOF (pos. mode) identified PG, Ala-PG, Acyl-PG, and Acyl-PG like lipid species in *C. glutamicum* wildtype (TL, IM, OM), TmaT KO mutant (TL, IM, OM) and PBQC (TL, IM, OM).

The lipids are sorted according to their size (Da). Saturated, mono- and di-unsaturated fatty acid chains were identified. **(A)** In total, 11 PG species were identified. They were more abundant in the IM compared to the OM. In addition, 55-60% less PG species were identified in the IM as well as the OM of the KO compared to the WT. **(B)** Two alanylated PG species were identified. They were found in the IM and the OM. **(C)** Three Acyl-PG species were identified in the IM. They were absent in the OM. **(D)** Four Acyl-PG like species were identified in the IM and OM of the WT. These species are completely absent in the KO. Isomeric lipid species are annotated in brackets as numbers.

| <b>A</b>             |              |        |                                      |                                          |                                          |         |     |     |         |         |
|----------------------|--------------|--------|--------------------------------------|------------------------------------------|------------------------------------------|---------|-----|-----|---------|---------|
| PG species           | 1st FA       | 2nd FA | Mass (NH <sub>4</sub> <sup>+</sup> ) | phosphatidylglycerol (PG)                |                                          |         |     |     |         | PBQC    |
|                      |              |        |                                      | TL                                       | WT                                       | IM      | OM  | TL  | IM      | OM      |
| 1                    | PG           | (12:0) | 710.497                              | yes                                      | yes                                      | yes     | no  | no  | no      | no      |
| 2                    | PG           | (16:0) | 736.513                              | yes                                      | yes (2)                                  | yes     | no  | no  | no      | yes     |
| 3                    | PG           | (14:0) | 738.528                              | yes                                      | yes                                      | yes     | yes | no  | yes     | yes     |
| 4                    | PG           | (15:0) | 752.543                              | yes                                      | yes                                      | yes     | no  | no  | yes     | yes     |
| 5                    | PG           | (16:2) | 762.528                              | yes                                      | yes                                      | yes     | no  | no  | yes     | no      |
| 6                    | PG           | (18:1) | 764.544                              | yes                                      | yes                                      | yes     | no  | no  | yes     | yes     |
| 7                    | PG           | (16:0) | 766.56                               | yes                                      | yes (2)                                  | yes     | yes | yes | yes     | yes     |
| 8                    | PG           | (17:0) | 780.574                              | yes                                      | yes                                      | yes     | no  | no  | yes     | yes     |
| 9                    | PG           | (18:1) | 790.559                              | yes                                      | yes                                      | yes     | no  | no  | yes     | yes     |
| 10                   | PG           | (18:1) | 792.576                              | yes                                      | yes                                      | yes     | yes | yes | yes     | yes     |
| 11                   | PG           | (18:0) | 794.59                               | yes                                      | yes                                      | yes     | yes | no  | yes     | yes     |
| Total (11):          |              |        |                                      | 11                                       | 11                                       | 11      | 5   | 5   | 2       | 10      |
|                      |              |        |                                      |                                          |                                          |         |     |     | 5       |         |
| <b>B</b>             |              |        |                                      |                                          |                                          |         |     |     |         |         |
| Ala-PG species       | 1st FA       | 2nd FA | Mass (H <sup>+</sup> )               | alanylated phosphatidylglycerol (Ala-PG) |                                          |         |     |     |         | PBQC    |
|                      |              |        |                                      | TL                                       | WT                                       | IM      | OM  | TL  | IM      | OM      |
| 1                    | Ala-PG       | (16:0) | 820.5737                             | yes (2)                                  | yes (2)                                  | yes (2) | yes | no  | yes (3) | yes (2) |
| 2                    | Ala-PG       | (18:1) | 846.5849                             | yes                                      | yes                                      | yes     | no  | no  | yes     | yes     |
| Total (2):           |              |        |                                      | 2                                        | 2                                        | 1       | 1   | 1   | 0       | 2       |
|                      |              |        |                                      |                                          |                                          |         |     |     | 2       | 1       |
| <b>C</b>             |              |        |                                      |                                          |                                          |         |     |     |         |         |
| Acyl-PG species      | 1st FA       | 2nd FA | 3rd FA                               | Mass (NH <sub>4</sub> <sup>+</sup> )     | acyl-phosphatidylglycerol (Acyl-PG)      |         |     |     |         |         |
|                      |              |        |                                      |                                          | TL                                       | WT      | IM  | OM  | TL      | IM      |
| 1                    | Acyl-PG      | (16:0) | (16:0)                               | 1004.7898                                | yes                                      | yes     | no  | no  | no      | yes     |
| 2                    | Acyl-PG      | (16:0) | (18:1)                               | 1030.805                                 | yes                                      | yes     | no  | yes | yes     | yes     |
| 3                    | Acyl-PG      | (18:1) | (18:1)                               | 1056.823                                 | yes                                      | yes     | no  | no  | no      | no      |
| Total (3):           |              |        |                                      |                                          | 3                                        | 3       | 0   | 1   | 0       | 2       |
| <b>D</b>             |              |        |                                      |                                          |                                          |         |     |     |         |         |
| Acyl-PG like species | 1st FA       | 2nd FA | 3rd FA                               | Mass (H <sup>+</sup> )                   | acyl-phosphatidylglycerol like (Acyl-PG) |         |     |     |         |         |
|                      |              |        |                                      |                                          | TL                                       | WT      | IM  | OM  | TL      | IM      |
| 1                    | Acyl-PG like | (16:0) | 240.24 Da                            | 963.7625                                 | yes                                      | yes     | yes | no  | no      | yes     |
| 2                    | Acyl-PG like | (16:0) | 266.26 Da                            | 983.7786                                 | yes                                      | yes     | yes | no  | no      | yes     |
| 3                    | Acyl-PG like | (16:0) | 268.27 Da                            | 991.7939                                 | yes                                      | yes     | yes | no  | no      | yes     |
| 4                    | Acyl-PG like | (16:0) | 268.27 Da                            | 1034.835 (NH <sub>4</sub> <sup>+</sup> ) | yes                                      | yes     | no  | no  | no      | no      |
| Total (4):           |              |        |                                      |                                          | 4                                        | 4       | 3   | 0   | 0       | 3       |

# **Supplementary Table 7**

Summary of LC-MS/MS ESI TOF (positive ionisation mode) identified cardiolipin (CL) lipid species in *C. glutamicum* wildtype (TL, IM, OM), TmaT KO mutant (TL, IM, OM) and PBQC (TL, IM, OM). Altogether, 18 cardiolipin species were identified within the size range of 1349.9 Da (DAG<sub>30:1</sub> + DAG<sub>34:1</sub> and DAG<sub>32:1</sub> + DAG<sub>32:1</sub>) to 1460.1 Da (DAG<sub>36:1</sub> + DAG<sub>36:2</sub>), based on 12 different diacylglycerol moieties. Isomeric lipid species are annotated in brackets as numbers.

|             | CL species | 1st DAG | 2nd DAG | Mass (H+) | cardiolipin (CL) |     |     |         |         |     |         |         |     |
|-------------|------------|---------|---------|-----------|------------------|-----|-----|---------|---------|-----|---------|---------|-----|
|             |            |         |         |           | WT               |     |     | TmaT KO |         |     | PBQC    |         |     |
|             |            |         |         |           | TL               | IM  | OM  | TL      | IM      | OM  | TL      | IM      | OM  |
| 1           | CL         | (30:1)  | (34:1)  | 1349.947  | yes              | yes | no  | yes     | yes     | no  | yes     | yes     | no  |
| 2           | CL         | (32:1)  | (32:1)  | 1375.963  | yes              | yes | no  | yes     | yes     | no  | yes     | yes     | no  |
| 3           | CL         | (32:2)  | (34:1)  | 1377.98   | yes              | yes | yes | yes     | yes     | yes | yes     | yes     | yes |
| 4           | CL         | (30:1)  | (34:1)  | 1391.996  | yes              | yes | no  | yes     | yes     | no  | yes     | yes     | no  |
| 5           | CL         | (32:1)  | (34:1)  | 1401.98   | yes              | yes | no  | yes (2) | yes (2) | no  | yes (2) | yes     | no  |
| 6           | CL         | (34:1)  | (34:3)  | 1403.996  | yes              | yes | no  | yes     | yes     | no  | yes     | yes     | no  |
| 7           | CL         | (34:1)  | (34:2)  | 1406.012  | yes (3)          | yes | yes | yes (5) | yes (2) | yes | yes (3) | yes (3) | yes |
| 8           | CL         | (33:1)  | (36:2)  | 1418.01   | yes              | no  | no  | no      | no      | no  | no      | no      | no  |
| 9           | CL         | (34:1)  | (35:2)  | 1420.02   | yes (2)          | yes | no  | yes (2) | yes     | no  | yes (2) | yes     | no  |
| 10          | CL         | (34:1)  | (36:3)  | 1430.01   | yes              | yes | no  | yes     | yes     | no  | yes     | yes     | no  |
| 11          | CL         | (34:0)  | (36:2)  | 1432.027  | yes              | yes | no  | yes     | yes     | no  | yes     | yes     | no  |
| 12          | CL         | (34:1)  | (36:2)  | 1434.041  | yes              | yes | yes | yes     | yes     | yes | yes     | yes     | yes |
| 13          | CL         | (34:1)  | (36:1)  | 1458.042  | yes              | yes | no  | yes     | yes     | yes | yes     | yes     | no  |
| 14          | CL         | (36:2)  | (36:2)  | 1460.056  | no               | yes | no  | no      | no      | no  | no      | no      | no  |
| 15          | CL         | (36:1)  | (36:2)  | 1460.056  | no               | yes | no  | no      | no      | no  | no      | no      | no  |
| Total (18): |            |         |         |           | 16               | 16  | 3   | 14      | 14      | 4   | 14      | 14      | 3   |

Supplementary Table 8

Summary of LC-MS/MS ESI TOF (pos. mode) identified PI, PIM1, PIM2, AcPIM2-4, GI-A and GI-X/Y/Z lipid species in *C. glutamicum* wildtype (TL, IM, OM), TmaT KO mutant (TL, IM, OM) and PBQC (TL, IM, OM). The lipids are sorted according to their size (Da). Saturated, mono- and di-unsaturated fatty acid chains were identified. Isomeric lipid species are annotated in brackets as numbers.

| A          | PI species       | phosphatidylinositol (PI)                              |        |             |             |         |     |         | Total (6): |                   |
|------------|------------------|--------------------------------------------------------|--------|-------------|-------------|---------|-----|---------|------------|-------------------|
|            |                  | 1st FA                                                 | 2nd FA | Mass (NH4+) | TL          | IM      | OM  | PBQC    |            |                   |
| 1          | PI               | (14:0)                                                 | (18:1) | 826.5435    | yes         | yes     | yes | yes     | yes        | no                |
| 2          | PI               | (15:0)                                                 | (18:1) | 840.5598    | no          | no      | no  | yes     | no         | no                |
| 3          | PI               | (16:1)                                                 | (18:1) | 852.5596    | yes         | yes     | no  | yes (3) | yes        | no                |
| 4          | PI               | (16:0)                                                 | (18:1) | 854.5765    | yes         | yes     | yes | yes     | yes        | yes               |
| 5          | PI               | (18:1)                                                 | (18:1) | 880.5937    | no          | no      | yes | no      | no         | yes               |
| 6          | PI               | (18:0)                                                 | (18:1) | 882.6073    | yes         | yes     | no  | no      | yes        | no                |
| Total (6): |                  |                                                        |        |             |             |         |     |         |            | 4 4 3 2 3 2 4 4 2 |
| B          | PIM1/2 species   | phosphatidyl 1/2-mannoside (PIM1/2)                    |        |             |             |         |     |         | Total (2): |                   |
|            |                  | 1st FA                                                 | 2nd FA | Mass (NH4+) | TL          | IM      | OM  | PBQC    |            |                   |
| 1          | PIM1             | (16:0)                                                 | (18:1) | 1016.629    | yes         | yes     | no  | yes     | yes        | no                |
| 2          | PIM2             | (16:0)                                                 | (18:1) | 1178.68     | yes         | yes     | yes | yes     | yes        | yes               |
| Total (2): |                  |                                                        |        |             |             |         |     |         |            | 2 2 1 2 2 1 2 2 1 |
| C          | AcPIM2-4 species | acyl phosphatidyl 2/3/4-mannoside (AcPIM2-4)           |        |             |             |         |     |         | Total (9): |                   |
|            |                  | 1st FA                                                 | 2nd FA | 3rd FA      | Mass (NH4+) | TL      | IM  | OM      |            |                   |
| 1          | AcPIM2           | (32:1)                                                 | (16:0) | (16:0)      | 1388.879    | no      | yes | yes     | yes        | yes               |
| 2          | AcPIM2           | (34:2)                                                 | (16:0) | (14:1)      | 1414.895    | yes     | yes | no      | no         | no                |
| 3          | AcPIM2           | (34:1)                                                 | (16:0) | (14:1)      | 1416.912    | yes     | yes | yes     | yes        | yes               |
| 4          | AcPIM2           | (35:1)                                                 | (16:0) | (14:0)      | 1430.926    | yes     | no  | yes     | no         | yes               |
| 5          | AcPIM2           | (35:0)                                                 | (16:0) | (14:2)      | 1432.941    | no      | no  | yes     | yes        | no                |
| 6          | AcPIM2           | (36:2)                                                 | (16:0) | (14:2)      | 1442.926    | yes     | yes | no      | yes        | yes               |
| 7          | AcPIM2           | (36:1)                                                 | (16:0) | (14:1)      | 1444.941    | yes     | no  | yes     | yes        | yes               |
| 8          | AcPIM3           | (34:1)                                                 | (16:0) | (15:0)      | 1578.964    | yes     | yes | no      | yes        | yes               |
| 9          | AcPIM4           | (34:1)                                                 | (16:0) | (15:1)      | 1741.018    | no      | yes | yes     | no         | yes               |
| Total (9): |                  |                                                        |        |             |             |         |     |         |            | 6 6 1 8 7 1 5 7 1 |
| D          | GI-A species     | glucopyranosyluronic acid diacylglycerol (GI-A)        |        |             |             |         |     |         | Total (8): |                   |
|            |                  | 1st FA                                                 | 2nd FA | Mass (NH4+) | TL          | IM      | OM  | PBQC    |            |                   |
| 1          | GI-A             | (12:0)                                                 | (18:1) | 732.5264    | yes         | no      | no  | no      | no         | no                |
| 2          | GI-A             | (14:0)                                                 | (18:1) | 760.5578    | yes         | yes     | yes | yes     | yes        | no                |
| 3          | GI-A             | (15:0)                                                 | (18:1) | 774.572     | yes         | yes     | yes | yes     | yes        | no                |
| 4          | GI-A             | (16:1)                                                 | (18:1) | 786.5721    | yes         | yes     | yes | yes     | yes        | yes               |
| 5          | GI-A             | (16:0)                                                 | (18:1) | 788.5892    | yes (2)     | yes (2) | yes | yes     | yes (2)    | yes               |
| 6          | GI-A             | (17:0)                                                 | (18:1) | 802.6035    | no          | no      | no  | no      | yes        | no                |
| 7          | GI-A             | (18:1)                                                 | (18:1) | 814.6043    | yes         | yes     | yes | yes     | yes        | yes               |
| 8          | GI-A             | (18:0)                                                 | (18:1) | 816.619     | yes         | yes     | yes | yes     | yes        | yes               |
| Total (8): |                  |                                                        |        |             |             |         |     |         |            | 7 6 2 6 5 1 7 5 1 |
| E          | GI-X/Y/Z species | 1-3 mannosyl-glucuronic acid diacylglycerol (GI-X/Y/Z) |        |             |             |         |     |         | Total (9): |                   |
|            |                  | 1st FA                                                 | 2nd FA | Mass (NH4+) | TL          | IM      | OM  | PBQC    |            |                   |
| 1          | GI-X             | (14:1)                                                 | (16:0) | 894.5837    | yes         | yes     | no  | no      | no         | no                |
| 2          | GI-X             | (14:0)                                                 | (18:1) | 922.611     | yes         | yes     | yes | yes     | yes        | no                |
| 3          | GI-X             | (16:0)                                                 | (18:2) | 948.6246    | yes         | yes     | yes | yes     | yes        | no                |
| 4          | GI-X             | (16:1)                                                 | (18:1) | 950.6409    | yes         | yes     | yes | yes     | yes        | yes               |
| 5          | GI-X             | (18:0)                                                 | (18:1) | 978.6713    | yes         | yes     | no  | no      | no         | yes               |
| 6          | GI-Y             | (16:0)                                                 | (18:1) | 1112.694    | no          | yes     | yes | yes     | yes        | yes               |
| 7          | GI-Z             | (16:0)                                                 | (18:1) | 1274.747    | yes         | yes     | yes | yes     | yes        | no                |
| Total (9): |                  |                                                        |        |             |             |         |     |         |            | 7 8 1 6 6 2 6 7 1 |

**Supplementary Table 9**

Summary of 185 identified lipids in *C. glutamicum*, representing 28 lipid (sub)classes. The relative abundance (n=6) of each lipid is given, as well as the raw p values and fold-changes when the inner and outer membranes are compared between the *C. glutamicum* wildtype and the TmaT mutant. The letters A-F refer to the same letters as in Figure 4. The *slash* signs mean that the p value or the fold change are outside of significance (p value 0.05, fold change <1). The fold change values also refer to Figure 5. The n/a signs mean that this lipid wasn't identified.

|    |              | abundance/peak area (mean, n=6) |          |              |              | TmaT (IM)/WT (IM) |             | TmaT (OM)/WT (OM) |             |          |
|----|--------------|---------------------------------|----------|--------------|--------------|-------------------|-------------|-------------------|-------------|----------|
|    |              | WT (IM)                         | WT (OM)  | TmaT KO (IM) | TmaT KO (OM) | raw p-value       | fold change | raw p-value       | fold change |          |
| A  | 1            | DAG 14:0 18:1                   | 7.67E+05 | 0.00E+00     | 7.08E+05     | 0.00E+00          | 1.71E-02    | /                 | n/a         | n/a      |
|    | 2            | DAG 16:2 18:1                   | 5.23E+05 | 0.00E+00     | 5.89E+05     | 0.00E+00          | 9.74E-04    | /                 | n/a         | n/a      |
|    | 3            | DAG 16:1 18:1                   | 3.26E+06 | 0.00E+00     | 3.61E+06     | 0.00E+00          | 5.98E-05    | /                 | n/a         | n/a      |
|    | 4            | DAG 16:0 18:1                   | 1.29E+07 | 1.29E+06     | 1.28E+07     | 2.90E+06          | /           | /                 | 6.38E-08    | 3.4156   |
|    | 5            | DAG 18:1 18:2                   | 2.49E+06 | 0.00E+00     | 2.24E+06     | 0.00E+00          | /           | /                 | n/a         | n/a      |
|    | 6            | DAG 18:1 18:1                   | 1.05E+07 | 4.30E+05     | 6.34E+06     | 1.97E+05          | /           | /                 | /           | /        |
|    | 7            | DAG 18:0 18:1                   | 1.84E+06 | 0.00E+00     | 1.38E+06     | 0.00E+00          | /           | /                 | n/a         | n/a      |
|    | 8            | Ala-DAG 14:0 18:1               | 3.62E+06 | 0.00E+00     | 4.53E+05     | 0.00E+00          | 1.98E-08    | 0.1492            | n/a         | n/a      |
|    | 9            | Ala-DAG 15:0 18:1               | 8.99E+05 | 0.00E+00     | 3.00E+05     | 0.00E+00          | 4.12E-07    | 0.40278           | n/a         | n/a      |
|    | 10           | Ala-DAG 16:2 18:1               | 3.41E+05 | 0.00E+00     | 7.77E+04     | 0.00E+00          | 6.00E-07    | 0.27191           | n/a         | n/a      |
|    | 11           | Ala-DAG 16:1 18:1               | 4.84E+06 | 0.00E+00     | 5.48E+05     | 0.00E+00          | 1.34E-09    | 0.13594           | n/a         | n/a      |
|    | 12           | Ala-DAG 16:0 18:1               | 1.19E+07 | 1.77E+06     | 1.04E+07     | 3.89E+05          | /           | /                 | 1.68E-06    | 0.31627  |
|    | 13           | Ala-DAG 16:0 18:0               | 1.01E+05 | 0.00E+00     | 7.33E+04     | 0.00E+00          | /           | /                 | n/a         | n/a      |
|    | 14           | Ala-DAG 17:0 18:1               | 4.54E+05 | 0.00E+00     | 1.10E+05     | 0.00E+00          | 6.05E-07    | /                 | n/a         | n/a      |
|    | 15           | Ala-DAG 36:4                    | 0.00E+00 | 3.43E+05     | 0.00E+00     | 7.67E+04          | n/a         | n/a               | 1.16E-07    | 0.32835  |
|    | 16           | Ala-DAG 18:1 18:2               | 1.23E+06 | 0.00E+00     | 1.97E+05     | 0.00E+00          | 1.77E-07    | 0.18997           | n/a         | n/a      |
|    | 17           | Ala-DAG 18:1 18:1               | 1.22E+07 | 0.00E+00     | 1.31E+06     | 0.00E+00          | 9.03E-12    | 0.12906           | n/a         | n/a      |
|    | 18           | Ala-DAG 18:0 18:1               | 2.72E+06 | 0.00E+00     | 2.55E+05     | 0.00E+00          | 4.32E-09    | 0.1117            | n/a         | n/a      |
|    | 19           | Ala-DAG (38:5)                  | 5.78E+05 | 0.00E+00     | 6.31E+04     | 0.00E+00          | 3.23E-12    | 0.13348           | n/a         | n/a      |
|    | 20           | PA 18:1 18:1                    | 3.51E+05 | 0.00E+00     | 8.04E+04     | 0.00E+00          | 4.34E-07    | 0.28253           | n/a         | n/a      |
|    | 21           | CDP-DAG 34:1                    | 1.75E+05 | 0.00E+00     | 7.36E+04     | 0.00E+00          | 3.03E-07    | /                 | n/a         | n/a      |
|    | 22           | TAG 16:0 16:0 16:0              | 1.37E+05 | 1.06E+05     | 1.87E+05     | 1.18E+05          | /           | /                 | /           | /        |
|    | 23           | TAG 16:0 16:0 18:2              | 1.99E+05 | 1.12E+05     | 2.62E+05     | 1.30E+05          | 1.75E-06    | /                 | /           | /        |
|    | 24           | TAG 16:0 16:0 18:1              | 6.43E+05 | 4.65E+05     | 8.94E+05     | 5.46E+05          | 1.70E-06    | /                 | 1.26E-02    | /        |
|    | 25           | TAG 16:0 18:1 18:2              | 1.95E+05 | 1.14E+05     | 2.96E+05     | 1.36E+05          | 3.91E-07    | /                 | /           | /        |
|    | 26           | TAG 16:0 18:1 18:1              | 6.35E+05 | 2.90E+05     | 2.45E+06     | 4.69E+05          | 1.96E-12    | 4.6924            | 6.53E-04    | 2.5586   |
|    | 27           | TAG 16:0 18:0 18:1              | 0.00E+00 | 7.06E+04     | 0.00E+00     | 8.03E+04          | 1.39E-12    | 4.8479            | /           | /        |
|    | 28           | TAG 18:1 18:1 18:1              | 1.98E+05 | 9.00E+04     | 2.11E+05     | 1.04E+05          | /           | /                 | /           | /        |
|    | 29           | TAG 18:0 18:0 18:1              | 1.11E+05 | 7.85E+04     | 1.55E+05     | 9.26E+04          | 6.90E-07    | /                 | /           | /        |
| B  | 30           | PG 14:0 18:1                    | 4.34E+06 | 1.62E+05     | 6.06E+05     | 1.76E+04          | 4.20E-08    | 0.16965           | 7.44E-12    | 0.16199  |
|    | 31           | PG 15:0 18:1                    | 8.70E+05 | 0.00E+00     | 1.80E+05     | 0.00E+00          | 8.56E-08    | 0.25186           | n/a         | n/a      |
|    | 32           | PG 16:2 18:1                    | 2.00E+05 | 0.00E+00     | 2.79E+04     | 0.00E+00          | 1.73E-12    | 0.16871           | n/a         | n/a      |
|    | 33           | PG 16:1 18:1                    | 4.19E+06 | 1.07E+05     | 6.07E+05     | 8.26E+03          | 1.02E-07    | 0.17659           | 8.97E-11    | 0.1176   |
|    | 34           | PG 16:0 18:1                    | 5.83E+06 | 6.60E+06     | 5.75E+06     | 4.75E+06          | /           | /                 | /           | /        |
|    | 35           | PG 17:0 18:1                    | 4.48E+05 | 0.00E+00     | 1.46E+05     | 0.00E+00          | 1.66E-06    | 0.40197           | n/a         | n/a      |
|    | 36           | PG 18:1 18:2                    | 1.03E+06 | 0.00E+00     | 1.66E+05     | 0.00E+00          | 3.67E-08    | 0.1961            | n/a         | n/a      |
|    | 37           | PG 18:1 18:1                    | 3.34E+06 | 1.16E+06     | 9.67E+05     | 3.95E+04          | 3.69E-05    | 0.35683           | 5.93E-12    | 0.052255 |
|    | 38           | PG 18:0 18:1                    | 3.45E+06 | 1.19E+05     | 7.44E+05     | 1.38E+04          | 1.48E-04    | 0.26962           | 1.00E-08    | 0.17871  |
|    | 39           | Ala-PG 16:0 18:1                | 6.37E+06 | 3.21E+05     | 8.77E+05     | 1.75E+04          | 8.22E-13    | 0.16649           | 1.59E-11    | 0.081972 |
|    | 40           | Ala-PG 18:1 18:1                | 4.04E+05 | 0.00E+00     | 1.42E+04     | 0.00E+00          | 1.07E-13    | 0.042677          | n/a         | n/a      |
|    | 41           | Acyl-PG (49:1)                  | 1.50E+05 | 0.00E+00     | 3.57E+04     | 0.00E+00          | /           | /                 | n/a         | n/a      |
|    | 42           | Acyl-PG 18:1 16:0 16:0          | 1.59E+05 | 0.00E+00     | 2.70E+04     | 0.00E+00          | 2.34E-10    | 0.204             | n/a         | n/a      |
|    | 43           | Acyl-PG 18:1 18:1 16:0          | 1.56E+06 | 0.00E+00     | 3.73E+05     | 0.00E+00          | 2.12E-09    | 0.28777           | n/a         | n/a      |
|    | 44           | Acyl-PG like (m/z 963.763)      | 1.37E+06 | 6.16E+05     | 1.57E+04     | 5.98E+03          | 1.61E-12    | 0.013746          | 6.41E-12    | 0.014804 |
|    | 45           | Acyl-PG like (m/z 989.778)      | 4.42E+05 | 1.44E+05     | 8.78E+03     | 3.26E+03          | 5.26E-11    | 0.023691          | 1.73E-10    | 0.034763 |
|    | 46           | Acyl-PG like (m/z 991.794)      | 4.12E+05 | 0.00E+00     | 6.91E+03     | 0.00E+00          | 2.07E-13    | 0.02054           | n/a         | n/a      |
|    | 47           | Acyl-PG like (m/z 1008.82)      | 4.63E+05 | 1.04E+05     | 2.88E+03     | 1.25E+03          | 1.70E-13    | 0.0074487         | 1.06E-11    | 0.01859  |
|    | 48           | CL 30:1 34:1 / 32:1 32:1        | 2.35E+05 | 0.00E+00     | 4.67E+04     | 0.00E+00          | 4.87E-08    | 0.23938           | n/a         | n/a      |
|    | 49           | CL 32:2 34:1 / 30:1 36:2        | 2.09E+05 | 0.00E+00     | 1.89E+04     | 0.00E+00          | 3.40E-11    | 0.10845           | n/a         | n/a      |
|    | 50           | CL 32:1 34:1                    | 3.83E+06 | 0.00E+00     | 2.38E+06     | 0.00E+00          | 1.89E-05    | /                 | n/a         | n/a      |
|    | 51           | CL 33:1 34:1                    | 9.64E+05 | 0.00E+00     | 4.87E+05     | 0.00E+00          | 4.34E-08    | /                 | n/a         | n/a      |
|    | 52           | CL 34:1 34:3                    | 1.48E+05 | 0.00E+00     | 6.99E+04     | 0.00E+00          | 2.68E-06    | /                 | n/a         | n/a      |
|    | 53           | CL 34:1 34:2                    | 2.90E+06 | 0.00E+00     | 1.40E+06     | 0.00E+00          | 2.28E-07    | /                 | n/a         | n/a      |
|    | 54           | CL 34:1 34:1                    | 5.99E+06 | 2.93E+06     | 6.06E+06     | 3.56E+06          | 5.10E-03    | /                 | 2.25E-03    | /        |
|    | 55           | CL 34:1 35:1                    | 4.13E+05 | 0.00E+00     | 4.22E+05     | 0.00E+00          | /           | /                 | n/a         | n/a      |
|    | 56           | CL 34:1 36:3 / 34:0 36:2        | 3.79E+05 | 0.00E+00     | 1.78E+05     | 0.00E+00          | 1.44E-06    | /                 | n/a         | n/a      |
|    | 57           | CL 34:1 36:2                    | 2.52E+06 | 3.87E+05     | 7.34E+05     | 1.04E+05          | 5.96E-08    | 0.35941           | 6.24E-05    | 0.42468  |
|    | 58           | CL 34:1 36:1                    | 1.81E+06 | 0.00E+00     | 1.49E+06     | 0.00E+00          | /           | /                 | n/a         | n/a      |
| 59 | CL 36:2 36:2 | 2.49E+05                        | 0.00E+00 | 1.26E+04     | 0.00E+00     | 4.39E-12          | 0.061953    | n/a               | n/a         |          |
| 60 | CL 36:1 36:2 | 1.47E+05                        | 0.00E+00 | 2.81E+04     | 0.00E+00     | 2.14E-10          | 0.23305     | n/a               | n/a         |          |

Supplementary Table 9, continued

|   |     |                            |          |          |          |          |           |          |          |          |
|---|-----|----------------------------|----------|----------|----------|----------|-----------|----------|----------|----------|
|   | 61  | PI 14:0 18:1               | 9.68E+05 | 0.00E+00 | 5.34E+05 | 0.00E+00 | 2.98E-06  | /        | n/a      | n/a      |
|   | 62  | PI 16:1 18:1               | 7.73E+05 | 0.00E+00 | 4.87E+05 | 0.00E+00 | /         | /        | n/a      | n/a      |
|   | 63  | PI 16:0 18:1               | 4.40E+06 | 5.80E+06 | 3.85E+06 | 5.53E+06 | /         | /        | /        | /        |
|   | 64  | PI 18:0 18:1               | 6.06E+05 | 0.00E+00 | 3.49E+05 | 0.00E+00 | 1.67E-02  | /        | n/a      | n/a      |
|   | 65  | PI 18:1 18:1               | 0.00E+00 | 3.13E+05 | 0.00E+00 | 4.79E+04 | n/a       | n/a      | 1.21E-08 | 0.23352  |
|   | 66  | PIM1 16:0 18:1             | 1.23E+06 | 0.00E+00 | 5.12E+05 | 0.00E+00 | 4.24E-05  | /        | n/a      | n/a      |
|   | 67  | PIM2 16:0 18:1             | 1.46E+06 | 0.00E+00 | 1.07E+06 | 0.00E+00 | 8.44E-03  | /        | n/a      | n/a      |
|   | 68  | AcPIM2 32:1 16:0           | 6.84E+05 | 0.00E+00 | 3.06E+05 | 0.00E+00 | 1.32E-04  | /        | n/a      | n/a      |
|   | 69  | AcPIM2 34:2 16:0           | 1.96E+05 | 0.00E+00 | 6.10E+04 | 0.00E+00 | 4.05E-09  | 0.37716  | n/a      | n/a      |
|   | 70  | AcPIM2 34:1 16:0           | 5.57E+06 | 5.35E+05 | 4.41E+06 | 5.62E+05 | /         | /        | 3.28E-03 | /        |
|   | 71  | AcPIM2 36:2 16:0           | 1.07E+06 | 0.00E+00 | 3.10E+05 | 0.00E+00 | 1.23E-10  | 0.35274  | n/a      | n/a      |
|   | 72  | AcPIM2 36:1 16:0           | 1.47E+06 | 0.00E+00 | 1.06E+06 | 0.00E+00 | 0.0013707 | /        | n/a      | n/a      |
|   | 73  | AcPIM3 34:1 16:0           | 7.17E+05 | 0.00E+00 | 9.11E+05 | 0.00E+00 | 1.02E-02  | /        | n/a      | n/a      |
| C | 74  | AcPIM4 34:1 16:0           | 6.85E+05 | 0.00E+00 | 5.32E+05 | 0.00E+00 | /         | /        | n/a      | n/a      |
|   | 75  | GI-A 14:0 18:1             | 1.56E+06 | 0.00E+00 | 6.41E+05 | 0.00E+00 | 1.08E-07  | 0.49591  | n/a      | n/a      |
|   | 76  | GI-A 15:0 18:1             | 1.88E+05 | 0.00E+00 | 1.52E+05 | 0.00E+00 | /         | /        | n/a      | n/a      |
|   | 77  | GI-A 16:1 18:1             | 6.95E+05 | 0.00E+00 | 3.83E+05 | 0.00E+00 | 1.89E-05  | /        | n/a      | n/a      |
|   | 78  | GI-A 16:0 18:1             | 8.13E+06 | 8.66E+06 | 1.19E+07 | 3.20E+06 | 1.08E-03  | /        | 1.03E-05 | /        |
|   | 79  | GI-A 18:1 18:1             | 2.11E+05 | 0.00E+00 | 1.07E+05 | 0.00E+00 | 1.21E-02  | /        | n/a      | n/a      |
|   | 80  | GI-A 18:0 18:1             | 7.85E+05 | 0.00E+00 | 2.22E+05 | 0.00E+00 | 2.71E-07  | 0.34949  | n/a      | n/a      |
|   | 81  | GI-X 14:0 18:1             | 6.26E+05 | 0.00E+00 | 3.95E+05 | 0.00E+00 | 4.86E-03  | /        | n/a      | n/a      |
|   | 82  | GI-X 16:0 18:2 / 16:1 18:1 | 4.19E+05 | 0.00E+00 | 2.97E+05 | 0.00E+00 | 7.41E-04  | /        | n/a      | n/a      |
|   | 83  | GI-X 16:0 18:1             | 5.66E+06 | 3.79E+06 | 7.86E+06 | 2.46E+06 | 9.79E-03  | /        | /        | /        |
|   | 84  | GI-X 18:0 18:1             | 6.96E+05 | 0.00E+00 | 1.51E+05 | 0.00E+00 | 3.17E-11  | 0.26507  | n/a      | n/a      |
|   | 85  | GI-Y 16:0 18:1             | 1.25E+06 | 0.00E+00 | 5.09E+05 | 0.00E+00 | 2.81E-05  | /        | n/a      | n/a      |
|   | 86  | GI-Z 16:0 18:1             | 2.19E+06 | 0.00E+00 | 1.50E+06 | 0.00E+00 | 5.22E-03  | /        | n/a      | n/a      |
|   | 87  | hTMCM 24:0                 | 2.87E+05 | 1.79E+05 | 2.83E+05 | 4.58E+04 | /         | /        | 9.80E-06 | 0.40114  |
|   | 88  | hTMCM 26:1                 | 3.56E+05 | 2.09E+05 | 5.70E+05 | 8.29E+04 | 3.20E-07  | /        | 3.59E-03 | /        |
|   | 89  | hTMCM 26:0                 | 5.29E+05 | 2.97E+05 | 9.39E+05 | 7.14E+04 | 1.19E-06  | 2.1679   | 4.93E-06 | 0.37291  |
|   | 90  | hTMCM 27:1                 | 2.07E+05 | 0.00E+00 | 4.57E+04 | 0.00E+00 | 0.26822   | 4.68E-11 | n/a      | n/a      |
|   | 91  | hTMCM 28:2                 | 1.40E+05 | 0.00E+00 | 2.67E+05 | 0.00E+00 | 1.21E-03  | 2.3019   | n/a      | n/a      |
|   | 92  | hTMCM 28:1                 | 4.74E+05 | 2.38E+05 | 1.23E+06 | 7.49E+04 | 6.71E-08  | 3.1449   | 1.24E-04 | 0.4934   |
|   | 93  | hTMCM 28:0                 | 5.80E+05 | 2.22E+05 | 1.60E+06 | 3.94E+04 | 1.05E-08  | 3.3461   | 2.55E-08 | 0.27406  |
|   | 94  | hTMCM 30:3                 | 1.47E+05 | 1.24E+05 | 1.73E+05 | 1.46E+05 | /         | /        | 1.05E-02 | /        |
|   | 95  | hTMCM 30:2                 | 4.85E+04 | 0.00E+00 | 7.57E+05 | 0.00E+00 | 1.92E-11  | 19.021   | n/a      | n/a      |
|   | 96  | hTMCM 30:1                 | 4.72E+05 | 1.50E+05 | 1.20E+06 | 2.37E+04 | 1.02E-08  | 3.0808   | 2.26E-07 | 0.24843  |
|   | 97  | hTMCM 30:0                 | 2.18E+05 | 1.36E+06 | 1.87E+06 | 1.35E+05 | 7.20E-08  | 10.676   | 4.32E-07 | 0.15617  |
|   | 98  | hTMCM 31:0                 | 1.01E+05 | 7.02E+04 | 3.25E+05 | 1.12E+04 | 1.63E-06  | 3.9734   | 5.26E-10 | 0.2353   |
|   | 99  | hTMCM 32:3                 | 2.86E+04 | 0.00E+00 | 4.72E+05 | 0.00E+00 | 4.37E-14  | 20.113   | n/a      | n/a      |
|   | 100 | hTMCM 32:2                 | 2.25E+05 | 0.00E+00 | 2.35E+05 | 0.00E+00 | /         | /        | n/a      | n/a      |
|   | 101 | hTMCM 32:1                 | 1.77E+06 | 1.40E+06 | 5.04E+06 | 1.59E+05 | 3.06E-10  | 3.4847   | 1.29E-10 | 0.17204  |
| D | 102 | hTMCM 32:0                 | 1.44E+05 | 8.60E+06 | 6.25E+05 | 5.21E+06 | 1.14E-08  | 5.3786   | /        | /        |
|   | 103 | hTMCM 32:0                 | 7.66E+06 | 0.00E+00 | 9.24E+06 | 0.00E+00 | 2.11E-03  | /        | n/a      | n/a      |
|   | 104 | hTMCM 33:0                 | 2.45E+05 | 6.24E+04 | 8.41E+05 | 1.39E+04 | 2.21E-08  | 4.2193   | 1.49E-08 | 0.3336   |
|   | 105 | hTMCM 34:3                 | 0.00E+00 | 1.07E+05 | 0.00E+00 | 2.61E+04 | n/a       | n/a      | 2.12E-05 | 0.3855   |
|   | 106 | hTMCM 34:2                 | 2.90E+06 | 1.32E+06 | 1.19E+07 | 2.57E+05 | 1.19E-09  | 5.0778   | 7.55E-10 | 0.28692  |
|   | 107 | hTMCM 34:1                 | 7.71E+06 | 8.47E+06 | 8.66E+06 | 5.60E+06 | 2.57E-02  | /        | /        | /        |
|   | 108 | hTMCM 34:0                 | 6.93E+06 | 6.21E+06 | 7.59E+06 | 1.32E+06 | 1.59E-03  | /        | 7.92E-08 | 0.31501  |
|   | 109 | hTMCM 35:1                 | 1.21E+05 | 0.00E+00 | 4.27E+05 | 0.00E+00 | 7.75E-07  | 4.2954   | n/a      | n/a      |
|   | 110 | hTMCM 35:0                 | 3.52E+04 | 0.00E+00 | 1.69E+05 | 0.00E+00 | 1.59E-10  | 5.8738   | n/a      | n/a      |
|   | 111 | hTMCM 36:3                 | 2.23E+06 | 8.75E+05 | 5.93E+06 | 2.15E+05 | 2.01E-07  | 3.2915   | 1.69E-09 | 0.36463  |
|   | 112 | hTMCM 36:2                 | 0.00E+00 | 6.52E+06 | 0.00E+00 | 3.99E+06 | n/a       | n/a      | /        | /        |
|   | 113 | hTMCM 36:1                 | 4.90E+06 | 3.96E+06 | 6.87E+06 | 6.67E+05 | 2.07E-04  | /        | 3.14E-10 | 0.24393  |
|   | 114 | hTMCM 36:0                 | 7.61E+05 | 4.78E+05 | 3.05E+06 | 2.94E+04 | 9.66E-09  | 4.923    | 8.79E-11 | 0.094379 |
|   | 115 | hTMCM 38:3                 | 7.23E+04 | 0.00E+00 | 4.26E+05 | 0.00E+00 | 1.85E-09  | 7.2154   | n/a      | n/a      |
|   | 116 | hTMCM 38:2                 | 2.01E+05 | 1.28E+05 | 5.19E+05 | 2.54E+04 | 1.42E-06  | 3.1621   | 6.92E-10 | 0.29319  |
|   | 117 | hTMCM 38:1                 | 4.07E+04 | 0.00E+00 | 2.38E+05 | 0.00E+00 | 9.64E-12  | 7.1515   | n/a      | n/a      |

Supplementary Table 9, continued

|       |                              |          |          |          |          |          |          |          |          |
|-------|------------------------------|----------|----------|----------|----------|----------|----------|----------|----------|
| 118   | hGMM 26:0                    | 2.97E+05 | 7.16E+04 | 1.77E+05 | 3.02E+04 | 2.07E-03 | /        | 5.45E-05 | /        |
| 119   | hGMM 28:1                    | 1.49E+05 | 0.00E+00 | 1.11E+05 | 0.00E+00 | /        | /        | n/a      | n/a      |
| 120   | hGMM 30:0                    | 5.94E+04 | 0.00E+00 | 2.65E+05 | 0.00E+00 | 5.89E-07 | 5.3258   | n/a      | n/a      |
| 121   | hGMM 32:1                    | 7.47E+04 | 0.00E+00 | 1.39E+05 | 0.00E+00 | 1.83E-06 | 2.2585   | n/a      | n/a      |
| 122   | hGMM 32:0                    | 2.58E+06 | 1.09E+06 | 1.34E+06 | 2.53E+06 | 3.90E-04 | /        | 1.13E-07 | 3.4376   |
| 123   | hGMM 34:1                    | 1.48E+06 | 7.05E+05 | 2.20E+06 | 3.23E+06 | 3.76E-04 | /        | 4.05E-10 | 6.9371   |
| 124   | hGMM 34:0                    | 1.26E+06 | 3.12E+05 | 6.39E+05 | 3.15E+05 | 3.73E-05 | /        | 1.09E-03 | /        |
| 125   | hGMM 36:2                    | 3.48E+05 | 1.85E+05 | 1.35E+06 | 1.44E+06 | 1.36E-09 | 4.6693   | /        | /        |
| 126   | hGMM 36:1                    | 1.96E+05 | 7.44E+04 | 3.14E+05 | 1.41E+05 | 1.16E-05 | /        | 7.61E-10 | 2.7762   |
| 127   | hGMM 36:0                    | 4.07E+04 | 0.00E+00 | 2.02E+05 | 0.00E+00 | 1.90E-07 | 5.9716   | 6.18E-13 | 11.451   |
| 128   | AcTMCm 28:0                  | 7.45E+04 | 0.00E+00 | 9.25E+03 | 0.00E+00 | 1.48E-09 | 0.15112  | n/a      | n/a      |
| 129   | AcTMCm 32:1                  | 1.26E+05 | 1.71E+05 | 6.19E+04 | 6.05E+04 | 2.74E-04 | /        | 3.86E-05 | /        |
| 130   | AcTMCm 32:0                  | 1.49E+06 | 1.61E+06 | 2.57E+04 | 2.30E+05 | 1.20E-15 | 0.020997 | 3.01E-09 | 0.21325  |
| 131   | AcTMCm 34:2                  | 1.12E+05 | 7.42E+04 | 4.66E+04 | 6.07E+03 | 7.55E-05 | /        | 8.38E-12 | 0.12064  |
| 132   | AcTMCm 34:1                  | 6.41E+05 | 7.57E+05 | 1.41E+04 | 1.28E+05 | 5.98E-14 | 0.026541 | 5.80E-08 | 0.25321  |
| 133   | AcTMCm 34:0                  | 5.17E+05 | 4.61E+05 | 9.54E+03 | 1.96E+04 | 1.89E-16 | 0.022482 | 1.27E-12 | 0.061733 |
| E 134 | AcTMCm 36:2                  | 1.82E+05 | 1.90E+05 | 9.55E+03 | 2.53E+04 | 3.20E-14 | 0.064055 | 6.33E-10 | 0.19718  |
| 135   | ketoTMCm 32:0                | 5.81E+05 | 1.06E+05 | 8.44E+06 | 2.35E+05 | 2.17E-10 | 17.985   | 7.33E-09 | 3.3205   |
| 136   | ketoTMCm 34:2                | 1.10E+05 | 0.00E+00 | 9.82E+05 | 0.00E+00 | 1.62E-09 | 10.992   | n/a      | n/a      |
| 137   | ketoTMCm 34:0                | 6.40E+05 | 0.00E+00 | 3.82E+06 | 0.00E+00 | 1.69E-10 | 7.3251   | n/a      | n/a      |
| 138   | ketoTMCm 36:3                | 3.31E+05 | 0.00E+00 | 1.74E+06 | 0.00E+00 | 1.72E-09 | 6.473    | n/a      | n/a      |
| 139   | ketoTMCm 36:2                | 1.91E+06 | 0.00E+00 | 1.18E+07 | 0.00E+00 | 3.00E-09 | 7.5841   | n/a      | n/a      |
| 140   | ketoTMCm 36:1                | 3.83E+05 | 0.00E+00 | 3.65E+06 | 0.00E+00 | /        | /        | n/a      | n/a      |
| 141   | Acyl-hTMCm 16:0 32:1         | 4.28E+04 | 0.00E+00 | 2.53E+05 | 0.00E+00 | 2.09E-10 | 7.1772   | n/a      | n/a      |
| 142   | Acyl-hTMCm 16:0 32:0         | 8.35E+05 | 1.67E+05 | 1.85E+06 | 5.68E+04 | 2.75E-07 | 2.6787   | 1.14E-06 | 0.49993  |
| 143   | Acyl-hTMCm 16:0 34:1         | 1.25E+06 | 2.22E+05 | 2.44E+06 | 3.13E+05 | 1.34E-07 | 2.3492   | 1.34E-06 | 2.02     |
| 144   | Acyl-hTMCm 16:0 34:0         | 5.58E+05 | 0.00E+00 | 5.93E+05 | 0.00E+00 | 1.08E-03 | /        | n/a      | n/a      |
| 145   | Acyl-hTMCm 18:1 34:1         | 8.69E+05 | 1.07E+05 | 1.56E+06 | 3.41E+05 | 4.41E-07 | 2.1591   | 1.27E-09 | 4.549    |
| 146   | Acyl-hTMCm 18:1 34:0         | 3.96E+05 | 0.00E+00 | 4.52E+05 | 0.00E+00 | 5.66E-03 | /        | n/a      | n/a      |
| 147   | Acyl-hTMCm 18:1 36:2         | 1.67E+05 | 0.00E+00 | 5.37E+05 | 0.00E+00 | 2.06E-07 | 3.8421   | n/a      | n/a      |
| 148   | Ac1-hTDCm 32:0 32:0          | 3.98E+05 | 2.55E+05 | 2.09E+05 | 1.69E+05 | 9.30E-08 | /        | /        | /        |
| 149   | Ac1-hTDCm 32:0 34:1          | 0.00E+00 | 2.68E+05 | 0.00E+00 | 2.55E+05 | n/a      | n/a      | 2.17E-03 | /        |
| 150   | Ac1-hTDCm 32:0 34:0          | 1.66E+05 | 1.14E+05 | 5.61E+04 | 4.56E+04 | 3.58E-10 | 0.41042  | 1.82E-04 | /        |
| 151   | h2TDCm 24:0 32:0             | 0.00E+00 | 2.33E+05 | 0.00E+00 | 3.62E+05 | n/a      | n/a      | 1.31E-06 | 2.3306   |
| 152   | h2TDCm 58:2                  | 5.80E+04 | 0.00E+00 | 1.78E+05 | 0.00E+00 | 7.58E-09 | 3.7198   | n/a      | n/a      |
| 153   | h2TDCm 26:1 32:0             | 1.07E+05 | 4.75E+05 | 1.85E+05 | 5.15E+05 | 7.37E-07 | 2.1051   | 1.93E-03 | /        |
| 154   | h2TDCm 26:0 32:0             | 8.96E+05 | 1.18E+06 | 8.04E+05 | 1.07E+06 | /        | /        | 7.48E-04 | /        |
| 155   | h2TDCm 26:1 34:1             | 2.91E+05 | 3.98E+05 | 4.72E+05 | 5.83E+05 | 5.30E-08 | /        | 1.60E-06 | 2.2307   |
| 156   | h2TDCm 26:0 34:1 / 28:1 32:0 | 1.12E+06 | 1.52E+06 | 1.20E+06 | 1.76E+06 | 2.12E-02 | /        | 5.41E-06 | /        |
| 157   | h2TDCm 28:0 32:0 / 26:0 34:0 | 1.90E+06 | 1.15E+06 | 8.85E+05 | 6.23E+05 | 1.34E-07 | /        | 9.42E-03 | /        |
| 158   | h2TDCm 28:2 34:1             | 2.64E+05 | 2.05E+05 | 4.77E+05 | 3.82E+05 | 4.06E-08 | 2.1881   | 4.55E-08 | 2.7956   |
| 159   | h2TDCm 28:1 34:1             | 8.62E+05 | 8.26E+05 | 1.13E+06 | 1.18E+06 | 9.87E-06 | /        | 2.52E-07 | 2.1544   |
| 160   | h2TDCm 28:0 34:1             | 2.08E+06 | 1.26E+06 | 1.36E+06 | 9.70E+05 | 3.54E-05 | /        | /        | /        |
| 161   | h2TDCm 30:0 32:0             | 1.83E+06 | 1.21E+06 | 9.43E+05 | 7.15E+05 | 3.14E-08 | /        | /        | /        |
| 162   | h2TDCm 64:2                  | 1.23E+06 | 7.01E+05 | 1.04E+06 | 7.22E+05 | /        | /        | 8.91E-05 | /        |
| 163   | h2TDCm 32:0 32:1             | 2.94E+06 | 2.19E+06 | 2.03E+06 | 1.79E+06 | 6.51E-04 | /        | 3.29E-02 | /        |
| 164   | h2TDCm 32:0 32:0             | 4.38E+06 | 3.60E+06 | 3.08E+06 | 2.89E+06 | /        | /        | /        | /        |
| 165   | h2TDCm 65:1                  | 1.16E+05 | 8.15E+04 | 6.35E+04 | 5.56E+04 | 9.41E-06 | /        | /        | /        |
| 166   | h2TDCm 66:3                  | 8.69E+05 | 0.00E+00 | 8.31E+05 | 0.00E+00 | 3.74E-03 | /        | n/a      | n/a      |
| 167   | h2TDCm 32:0 34:2             | 2.98E+06 | 2.44E+06 | 2.76E+06 | 2.56E+06 | /        | /        | 1.35E-03 | /        |
| F 168 | h2TDCm 32:0 34:1             | 4.16E+06 | 3.71E+06 | 4.04E+06 | 3.74E+06 | /        | /        | 1.69E-02 | /        |
| 169   | h2TDCm 32:0 34:0             | 4.18E+06 | 3.31E+06 | 2.11E+06 | 1.89E+06 | 2.09E-06 | /        | /        | /        |
| 170   | h2TDCm 33:1 34:0             | 6.78E+04 | 1.57E+05 | 5.70E+04 | 3.60E+04 | /        | /        | 2.32E-08 | 0.34424  |
| 171   | h2TDCm 68:4                  | 6.72E+05 | 3.44E+05 | 8.40E+05 | 5.49E+05 | 8.09E-06 | /        | 4.19E-08 | 2.4173   |
| 172   | h2TDCm 68:3                  | 2.07E+06 | 1.69E+06 | 2.59E+06 | 2.43E+06 | 7.32E-06 | /        | 1.91E-05 | 2.2173   |
| 173   | h2TDCm 34:1 34:1             | 0.00E+00 | 2.70E+06 | 0.00E+00 | 3.19E+06 | n/a      | n/a      | 2.64E-03 | /        |
| 174   | h2TDCm 34:0 34:1             | 3.81E+06 | 3.01E+06 | 2.89E+06 | 2.66E+06 | /        | /        | /        | /        |
| 175   | h2TDCm 34:0 34:0             | 2.91E+06 | 1.93E+06 | 8.12E+05 | 5.99E+05 | 2.92E-12 | 0.33833  | 3.01E-04 | 0.49538  |
| 176   | h2TDCm 34:2 36:2             | 8.97E+05 | 6.63E+05 | 1.51E+06 | 1.36E+06 | 9.66E-10 | 2.0522   | 6.58E-07 | 3.1937   |
| 177   | h2TDCm 34:1 36:2             | 1.55E+06 | 1.22E+06 | 2.07E+06 | 1.89E+06 | 1.94E-07 | /        | 1.70E-04 | 2.4533   |
| 178   | h2TDCm 70:2                  | 1.83E+06 | 1.55E+06 | 2.03E+06 | 1.76E+06 | 1.02E-04 | /        | 1.18E-03 | /        |
| 179   | h2TDCm 34:0 36:1             | 2.04E+06 | 8.51E+05 | 8.20E+05 | 7.80E+05 | 1.29E-10 | 0.4865   | 4.29E-05 | /        |
| 180   | h2TDCm 34:0 36:0             | 6.59E+05 | 0.00E+00 | 9.86E+04 | 0.00E+00 | 1.18E-10 | 0.1803   | n/a      | n/a      |
| 181   | h2TDCm 36:2 36:3             | 1.36E+05 | 9.61E+04 | 3.49E+05 | 3.14E+05 | 1.94E-11 | 3.114    | 2.04E-08 | 5.0821   |
| 182   | h2TDCm 36:2 36:2             | 3.08E+05 | 2.49E+05 | 5.76E+05 | 5.35E+05 | 1.64E-08 | 2.2687   | 1.42E-05 | 3.3997   |
| 183   | h2TDCm 36:1 36:2             | 4.17E+05 | 3.40E+05 | 6.17E+05 | 5.12E+05 | 6.75E-08 | /        | 6.06E-05 | 2.3435   |
| 184   | h2TDCm 36:1 36:1             | 4.94E+05 | 3.16E+05 | 2.90E+05 | 1.81E+05 | 1.18E-05 | /        | /        | /        |
| 185   | h2TDCm 36:0 36:1             | 2.48E+05 | 9.95E+04 | 3.71E+04 | 1.94E+04 | 8.18E-10 | 0.1792   | 2.06E-07 | 0.30275  |

Supplementary Figure 1:

**High-performance thin-layer chromatography (HPTLC) analysis of lipid extracts from *C. glutamicum* wildtype, TmaT mutant and TmaT complementation strain.** Six biological replicates were analyzed for each lipid fraction and representative lanes shown in Figure 6A. A = Total Lipid, B = Inner Membrane (IM), C = Outer Membrane (OM) and sample set (Wildtype, TmaT mutant, TmaT Complementation Strain,. Some of the most common lipids are highlighted on the left-hand side of the figure. The asterisks mark the replicates which were selected for figure 6A.

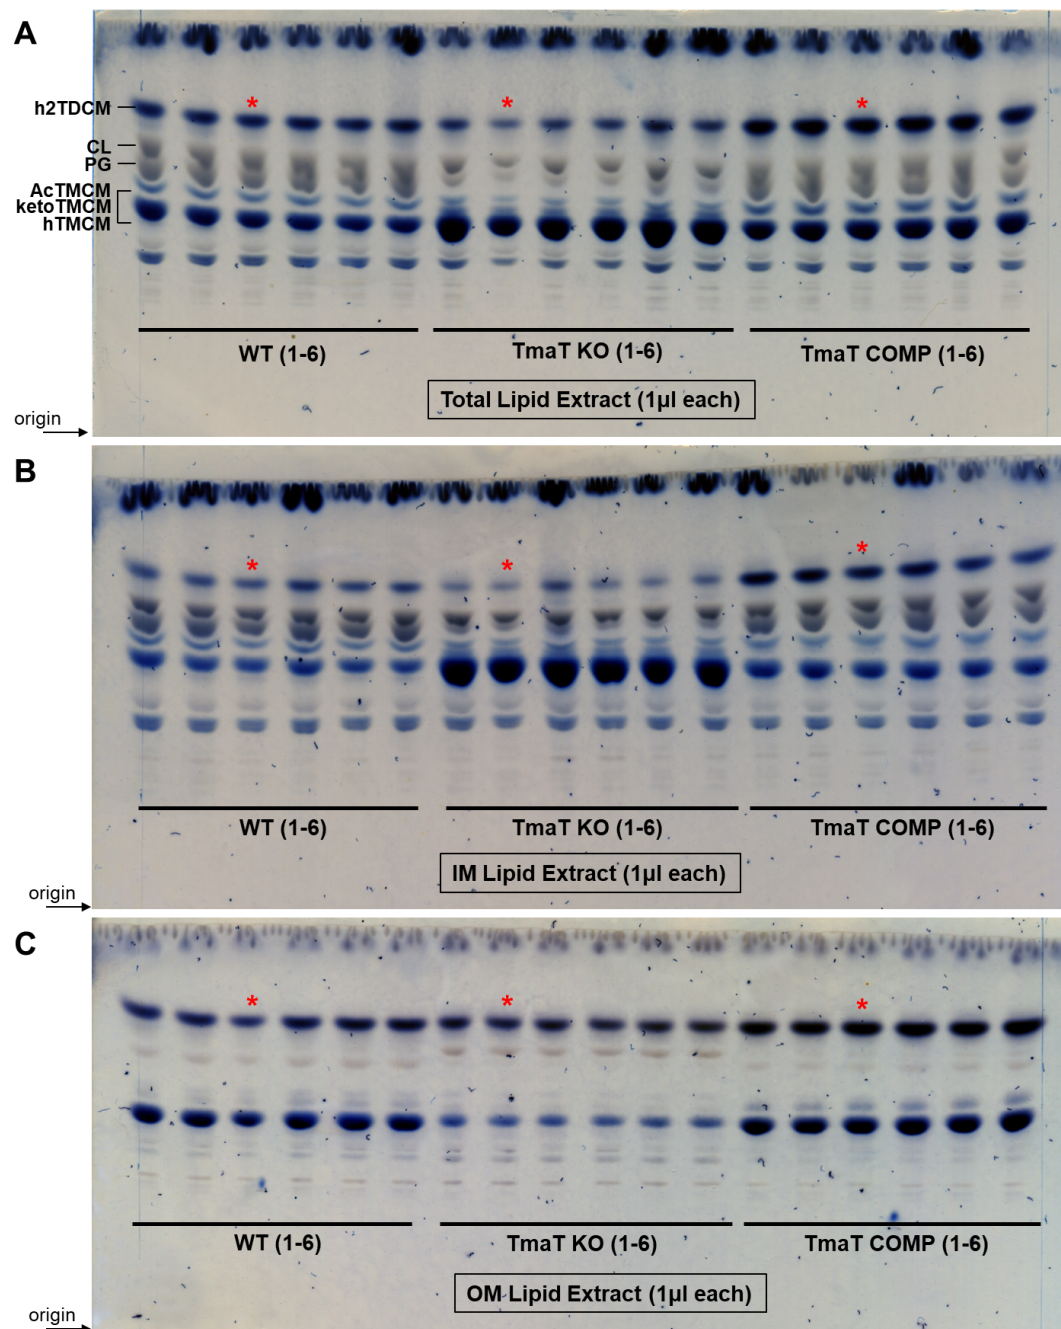

Supplement: 10.1194_M082784_jlr.M082784-1.pdf [file 10.1194_M082784_jlr.M082784-1.pdf]
